# Supplementary material for: Synthesis, chirality-dependent conformational and biological properties of siRNAs containing 5′-(R)- and 5′-(S)-C-methyl-guanosine
Source: PubMed Central journal article supplement (PMC7544225; doi:10.1093/nar/gkaa750), 2020-09-29

# Synthesis, Chirality-dependent Conformational and Biological Properties of siRNAs Containing 5'-(R)- and 5'-(S)-C-Methyl-Guanosine

Atsushi Mikami<sup>1,2</sup>, Namrata Erande<sup>1</sup>, Shigeo Matsuda<sup>1</sup>, Alexander Kel'in, Lauren Blair Woods<sup>1</sup>, Tyler Chickering<sup>1</sup>, Pradeep S. Pallan<sup>3</sup>, Mark K. Schlegel<sup>1</sup>, Ivan Zlatev<sup>1</sup>, Martin Egli<sup>3, \*</sup>, and Muthiah Manoharan<sup>1,\*</sup>

<sup>1</sup> Alnylam Pharmaceuticals, 300 Third Street, Cambridge, Massachusetts 02142, USA, <sup>2</sup>Current Address: Bioorganic Chemistry, Graduate School of Pharmaceutical Sciences, Osaka University 1-6 Yamadaoka, Suita, Osaka 565-0871, Japan, <sup>3</sup>Department of Biochemistry Vanderbilt University, School of Medicine Nashville, TN 37232, USA

\*To whom correspondence should be addressed. Tel: 617-551-8319; Email: [mmanoharan@alnylam.com](mailto:mmanoharan@alnylam.com); [martin.egli@vanderbilt.edu](mailto:martin.egli@vanderbilt.edu)

## CONTENT

- **Supplementary Table 1.** MS (*m/z*) analysis of modified oligonucleotides for exonuclease assay
- **Supplementary Table 2.** MS (*m/z*) analysis of modified oligonucleotides for *In Vitro* assay
- **Supplementary Table 3.** Primer and template sequences used in the mitochondrial polymerase incorporation and inhibition assays.
- **Supplementary figure 1:** Incorporation of native and 5'-C-methyl guanosine triphosphates by POLRMT *in vitro*.
- **Supplementary Figure 2:** Incorporation of native and 5'-C-methyl guanosine triphosphates by POLG *in vitro*.
- **Supplementary Table 4.** Selected crystal data, data collection and refinement parameters.
- **<sup>1</sup>H, <sup>13</sup>C and <sup>31</sup>P NMR spectra for the new compounds**

**Supplementary Table 1.** MS (*m/z*) analysis of modified oligonucleotides for exonuclease assay

| Sr. No. | Code                               | <sup>a</sup> Sequence                                                          | Mass       |          |
|---------|------------------------------------|--------------------------------------------------------------------------------|------------|----------|
|         |                                    |                                                                                | Calculated | Observed |
| 1       | G <sub>PO</sub> dT <sub>19</sub>   | GdTdTdTdTdTdTdTdTdTdTdTdTdTdTdTdTdTdTdTdTdTdTdTdT                              | 6062.9     | 6076.9   |
| 2       | S <sub>PO</sub> dT <sub>19</sub>   | G <sup>S</sup> dTdTdTdTdTdTdTdTdTdTdTdTdTdTdTdTdTdTdTdTdTdTdTdT                | 6076.9     | 6076.3   |
| 3       | R <sub>PO</sub> dT <sub>19</sub>   | G <sup>R</sup> dTdTdTdTdTdTdTdTdTdTdTdTdTdTdTdTdTdTdTdTdTdTdTdT                | 6076.9     | 6076.3   |
| 4       | G <sub>PS</sub> dT <sub>19</sub>   | G•dTdTdTdTdTdTdTdTdTdTdTdTdTdTdTdTdTdTdTdTdTdTdTdT                             | 6078.9     | 6078.4   |
| 5       | R <sub>PS</sub> dT <sub>19</sub>   | G <sup>R</sup> •dTdTdTdTdTdTdTdTdTdTdTdTdTdTdTdTdTdTdTdTdTdTdTdT               | 6093.0     | 6092.4   |
| 6       | S <sub>PS</sub> dT <sub>19</sub>   | G <sup>S</sup> •dTdTdTdTdTdTdTdTdTdTdTdTdTdTdTdTdTdTdTdTdTdTdTdT               | 6093.0     | 6092.4   |
| 7       | dT <sub>19PO</sub> G               | dTdTdTdTdTdTdTdTdTdTdTdTdTdTdTdTdTdTdTdTdTdTdTdTdTG                            | 6062.9     | 6062.3   |
| 8       | dT <sub>19PO</sub> S               | dTdTdTdTdTdTdTdTdTdTdTdTdTdTdTdTdTdTdTdTdTdTdTdTG <sup>S</sup>                 | 6093.0     | 6092.4   |
| 9       | dT <sub>19PO</sub> R               | dTdTdTdTdTdTdTdTdTdTdTdTdTdTdTdTdTdTdTdTdTdTdTdTG <sup>R</sup>                 | 6093.0     | 6092.4   |
| 10      | dT <sub>19PS</sub> G               | dTdTdTdTdTdTdTdTdTdTdTdTdTdTdTdTdTdTdTdTdTdTdTdT•G                             | 6078.9     | 6080.3   |
| 11      | dT <sub>19PS</sub> S               | dTdTdTdTdTdTdTdTdTdTdTdTdTdTdTdTdTdTdTdTdTdTdTdT•G <sup>S</sup>                | 6093.0     | 6092.3   |
| 12      | dT <sub>19PS</sub> R               | dTdTdTdTdTdTdTdTdTdTdTdTdTdTdTdTdTdTdTdTdTdTdTdT•G <sup>R</sup>                | 6093.0     | 6092.3   |
| 13      | dT <sub>18</sub> G <sub>PO</sub> G | dTdTdTdTdTdTdTdTdTdTdTdTdTdTdTdTdTdTdTdTdTdTdTdTGG                             | 6103.9     | 6103.3   |
| 14      | dT <sub>18</sub> S <sub>PO</sub> S | dTdTdTdTdTdTdTdTdTdTdTdTdTdTdTdTdTdTdTdTdTdTdTdTG <sup>S</sup> G <sup>S</sup>  | 6131.9     | 6131.4   |
| 15      | dT <sub>18</sub> R <sub>PO</sub> R | dTdTdTdTdTdTdTdTdTdTdTdTdTdTdTdTdTdTdTdTdTdTdTdTG <sup>R</sup> G <sup>R</sup>  | 6131.9     | 6131.4   |
| 16      | dT <sub>18</sub> G <sub>PS</sub> G | dTdTdTdTdTdTdTdTdTdTdTdTdTdTdTdTdTdTdTdTdTdTdTdTG•G                            | 6119.9     | 6119.3   |
| 17      | dT <sub>18</sub> S <sub>PS</sub> S | dTdTdTdTdTdTdTdTdTdTdTdTdTdTdTdTdTdTdTdTdTdTdTdTG <sup>S</sup> •G <sup>S</sup> | 6148.0     | 6147.4   |
| 18      | dT <sub>18</sub> R <sub>PS</sub> R | dTdTdTdTdTdTdTdTdTdTdTdTdTdTdTdTdTdTdTdTdTdTdTdTG <sup>R</sup> •G <sup>R</sup> | 6148.0     | 6147.4   |

<sup>a</sup> Modifications are indicated as follows: •, phosphorothioate (PS) linkage; dT, deoxy thymidine; G<sup>R</sup>, 5'-(R)-C-methyl-guanosine; and G<sup>S</sup>, (S)-C-methyl-guanosine.

**Supplementary Table 2.** MS (*m/z*) analysis of modified oligonucleotides for *in vitro* assay

| Sr.No. | Target | Sense strand (top)<br>Antisense strand (bottom) <sup>a</sup> | Modification<br>position <sup>b</sup> | Calculated<br>Mass | Observed<br>Mass |
|--------|--------|--------------------------------------------------------------|---------------------------------------|--------------------|------------------|
| Si-1   | TTR    | A•a•CaGuGuUCUuGcUcUaUaAL                                     |                                       | 8590.2             | 8590.3           |
|        |        | u•U•aUaGaGcAagaAcAcUgUu•u•u                                  |                                       | 7595.9             | 7597.6           |
| Si-2   | TTR    | A•a•CaG <sup>R</sup> uGuUCUuGcUcUaUaAL                       | S-5                                   | 8602.2             | 8602.8           |
|        |        | u•U•aUaGaGcAagaAcAcUgUu•u•u                                  |                                       | 7595.9             | 7597.7           |
| Si-3   | TTR    | A•a•CaGuG <sup>R</sup> uUCUuGcUcUaUaAL                       | S-7                                   | 8602.2             | 8602.9           |
|        |        | u•U•aUaGaGcAagaAcAcUgUu•u•u                                  |                                       | 7595.9             | 7596.9           |
| Si-4   | TTR    | A•a•CaGuGuUCUuGcUcUaUaAL                                     |                                       | 8590.2             | 8590.7           |
|        |        | u•U•aUaG <sup>R</sup> aGcAagaAcAcUgUu•u•u                    | AS-6                                  | 7608               | 7609.1           |
| Si-5   | TTR    | A•a•CaGuGuUCUuGcUcUaUaAL                                     |                                       | 8590.2             | 8590.8           |
|        |        | u•U•aUaGaG <sup>R</sup> cAagaAcAcUgUu•u•u                    | AS-8                                  | 7608               | 7608.8           |
| Si-6   | TTR    | A•a•CaG <sup>S</sup> uGuUCUuGcUcUaUaAL                       | S-5                                   | 8602.2             | 8603.2           |
|        |        | u•U•aUaGaGcAagaAcAcUgUu•u•u                                  |                                       | 7595.9             | 7597.5           |
| Si-7   | TTR    | A•a•CaGuG <sup>S</sup> uUCUuGcUcUaUaAL                       | S-7                                   | 8602.2             | 8603             |
|        |        | u•U•aUaGaGcAagaAcAcUgUu•u•u                                  |                                       | 7595.9             | 7596.5           |
| Si-8   | TTR    | A•a•CaGuGuUCUuGcUcUaUaAL                                     |                                       | 8590.2             | 8591             |
|        |        | u•U•aUaG <sup>S</sup> aGcAagaAcAcUgUu•u•u                    | AS-6                                  | 7608               | 7608.2           |
| Si-9   | TTR    | A•a•CaGuGuUCUuGcUcUaUaAL                                     |                                       | 8590.2             | 8591.3           |
|        |        | u•U•aUaGaG <sup>S</sup> cAagaAcAcUgUu•u•u                    | AS-8                                  | 7608               | 7608.4           |
| Si-10  | F12    | g•a•aacuCaAUAaagugcuuuuL                                     |                                       | 8756.6             | 8757.3           |
|        |        | u•A•aagCacuuuauUgAguuuc•u•g                                  |                                       | 7610               | 7610.8           |
| Si-11  | F12    | G <sup>R</sup> •a•aacuCaAUAaagugcuuuuL                       | S-1                                   | 8756.6             | 8757.4           |
|        |        | u•A•aagCacuuuauUgAguuuc•u•g                                  |                                       | 7610               | 7610.6           |
| Si-12  | F12    | G <sup>S</sup> •asaacuCaAUAaagugcuuuuL                       | S-1                                   | 8756.6             | 8757.3           |
|        |        | u•A•aagCacuuuauUgAguuuc•u•g                                  |                                       | 7610               | 7611             |

<sup>a</sup> Chemical modifications are indicated as follows: •, PS linkage; lower case, 2'-OMe; upper case and italics, 2'-F; G<sup>R</sup>, 5'-(R)-C-methyl-guanosine; G<sup>S</sup>, 5'-(S)-C-methyl-guanosine; L, trivalent GalNAc. <sup>b</sup> S and AS indicates sense and antisense strand, and number indicates position of modification from 5' end. ; L indicate tri-GalNAc it is hydroxypropyl trivalent N-acetyl galactosamine ligand.<sup>16</sup>

**Supplementary Table 3.** Primer and template sequences used in the mitochondrial polymerase incorporation and inhibition assays.

|          |    | POLRMT                      | POLG                                   |
|----------|----|-----------------------------|----------------------------------------|
| Primer   |    | 5'-Atto-425-UUUUGCCGCGCC-3' | 5'-Atto-425-d[CGATATTCACAAAG]-3'       |
| Template | G+ | 5'-d[GGGAATGTACGGCGCGGC]-3' | 5'-d[CATGCTCTAACCCGCCTTTGTGAATATCG]-3' |

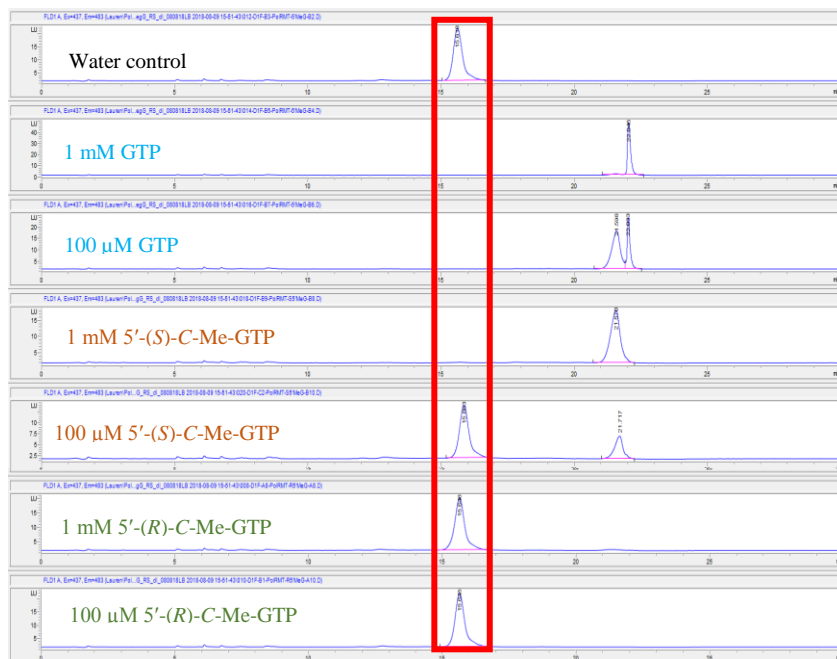

**Figure S1:** Incorporation of native and 5'-C-methyl-guanosine triphosphates by POLRMT *in vitro*. Reaction conditions: 200 nM template, 50 nM primer, 300 nM enzyme, and 1 mM or 100 μM NTP of interest, 30 min, 35 °C. Samples were run in duplicate and analysed using analytical HPLC using fluorescence detection. The red box marks the location of the non-extended primer.

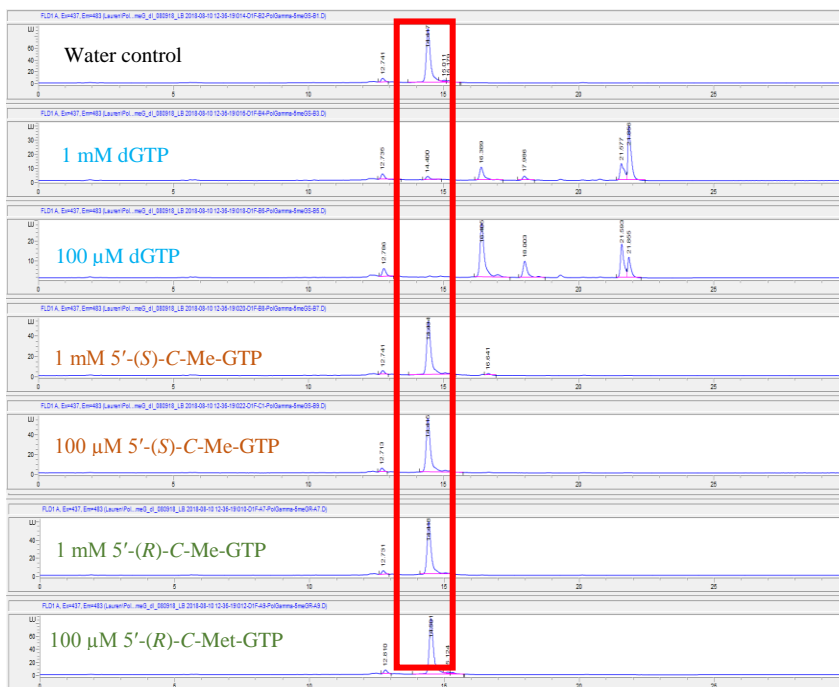

**Figure S2:** Incorporation of native and 5'-C-methyl guanosine triphosphates by POLG *in vitro*. Reaction conditions: 200 nM template, 50 nM primer, 300 nM enzyme, and 1 mM or 100  $\mu$ M NTP of interest, 30 min, 35  $^{\circ}$ C. Samples were run in duplicate and analysed using analytical HPLC using fluorescence detection. The red box marks the location of the non-extended primer.

**Supplementary Table 4** Selected crystallographic data and data collection and refinement parameters for 5'-CCCCXGGG-3' (X=(R)-5'-C-Me-guanosine)

|                                                                    |                                     |
|--------------------------------------------------------------------|-------------------------------------|
| Space group                                                        | P61                                 |
| Unit cell constants a, b, c [Å]; $\alpha$ , $\beta$ , $\gamma$ [°] | 37.92, 37.92, 57.85, 90, 90, 120    |
| Data Collection                                                    |                                     |
| Wavelength [Å]                                                     | 0.91833                             |
| Resolution [Å]                                                     | 21.72-1.56 (1.62-1.56) <sup>a</sup> |
| No. of unique reflections                                          | 6,721 (627)                         |
| Redundancy                                                         | 18.5 (12.1)                         |
| I/ $\sigma$ (I)                                                    | 63.3 (1.33)                         |
| Completeness [%]                                                   | 99.3 (92.4)                         |
| R-merge                                                            | 0.063 (0.869)                       |
| R-pim                                                              | 0.015 (0.243)                       |
| Refinement                                                         |                                     |
| No. of reflections                                                 | 6,392 (295)                         |
| R-work [%]                                                         | 0.177 (0.259)                       |
| R-free [%]                                                         | 0.244 (0.268)                       |
| No. of RNA atoms                                                   | 340                                 |
| No. of ions (Co3+)/waters                                          | 5/30                                |
| R.m.s. deviations bonds [Å]                                        | 0.029                               |
| R.m.s. deviations angles [°]                                       | 1.85                                |
| Avg. B-factor, DNA atoms [Å <sup>2</sup> ]                         | 37.6                                |
| Avg. B-factor, ions/water [Å <sup>2</sup> ]                        | 36.4/48.9                           |
| PDB entry code                                                     | 6VEM                                |

<sup>a</sup> Values in parentheses refer to the highest resolution shell

# $^1\text{H}$ , $^{13}\text{C}$ and $^{31}\text{P}$ NMR spectra of the new compounds

$^1\text{H}$  NMR spectrum of compound **3** in DMSO- $d_6$

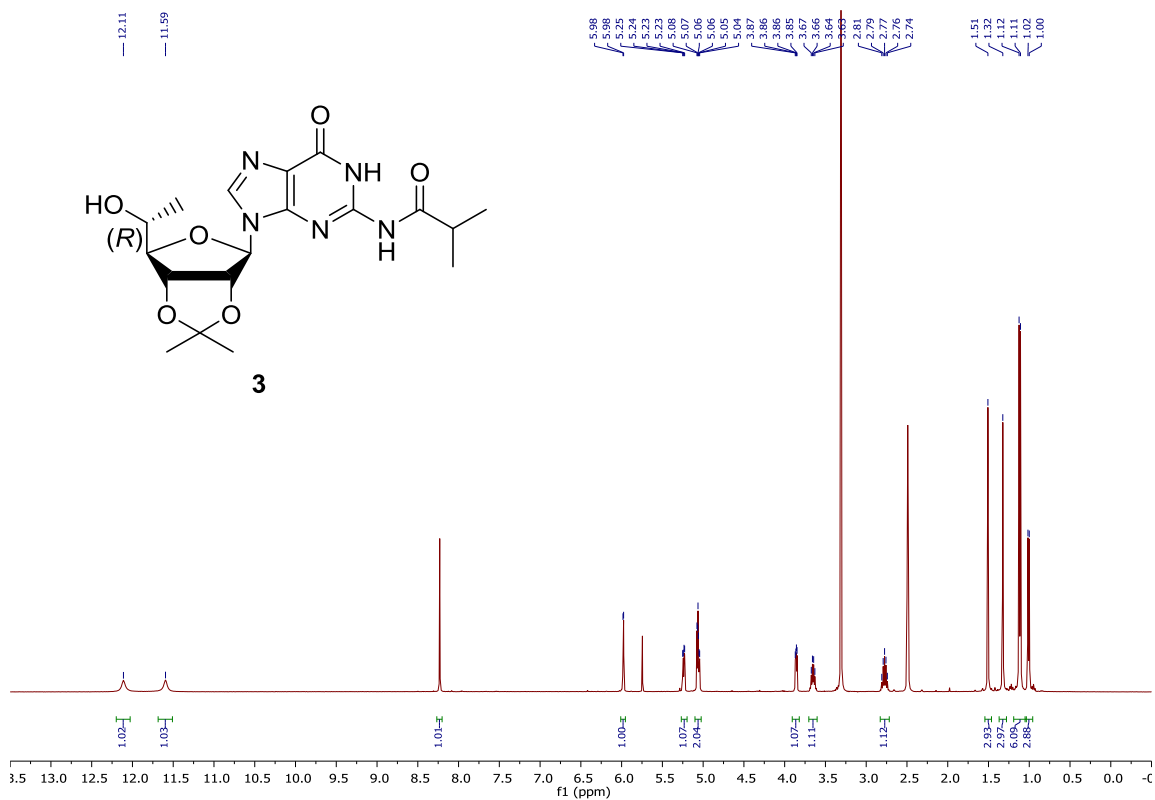

$^{13}\text{C}$  NMR spectrum of compound **3** in DMSO- $d_6$

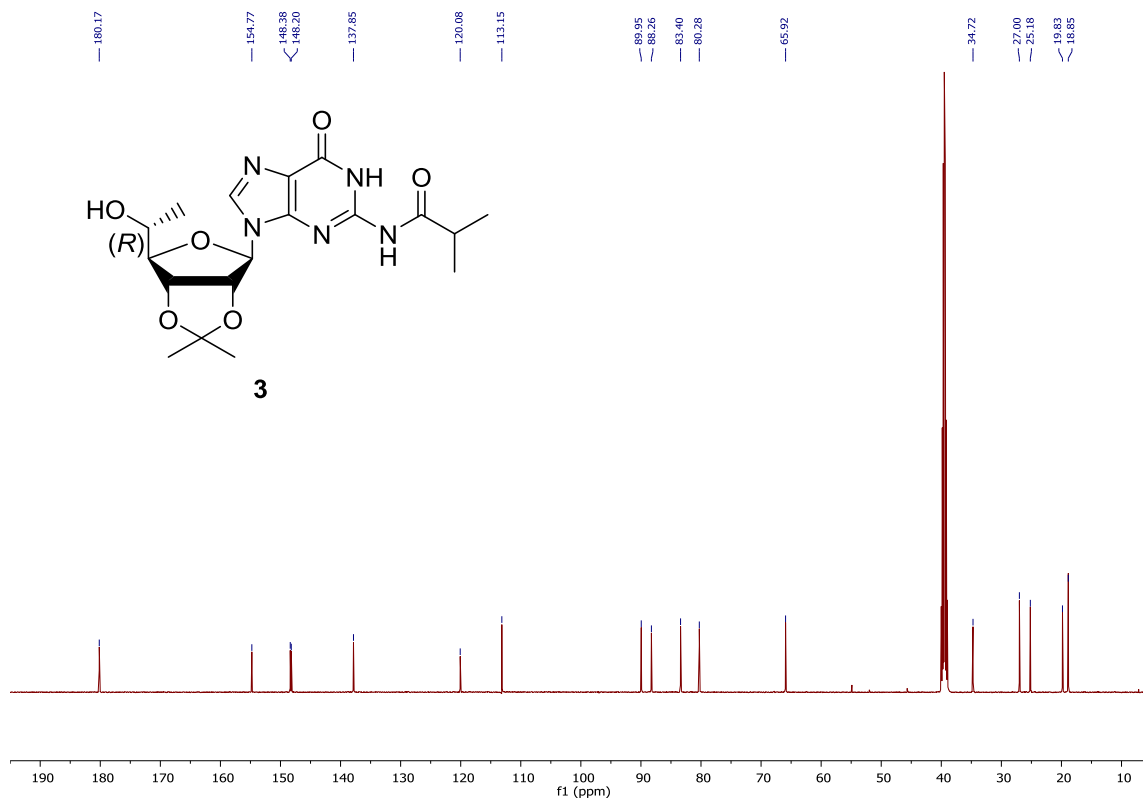

<sup>1</sup>H NMR spectrum of compound **4** in DMSO-d<sub>6</sub>

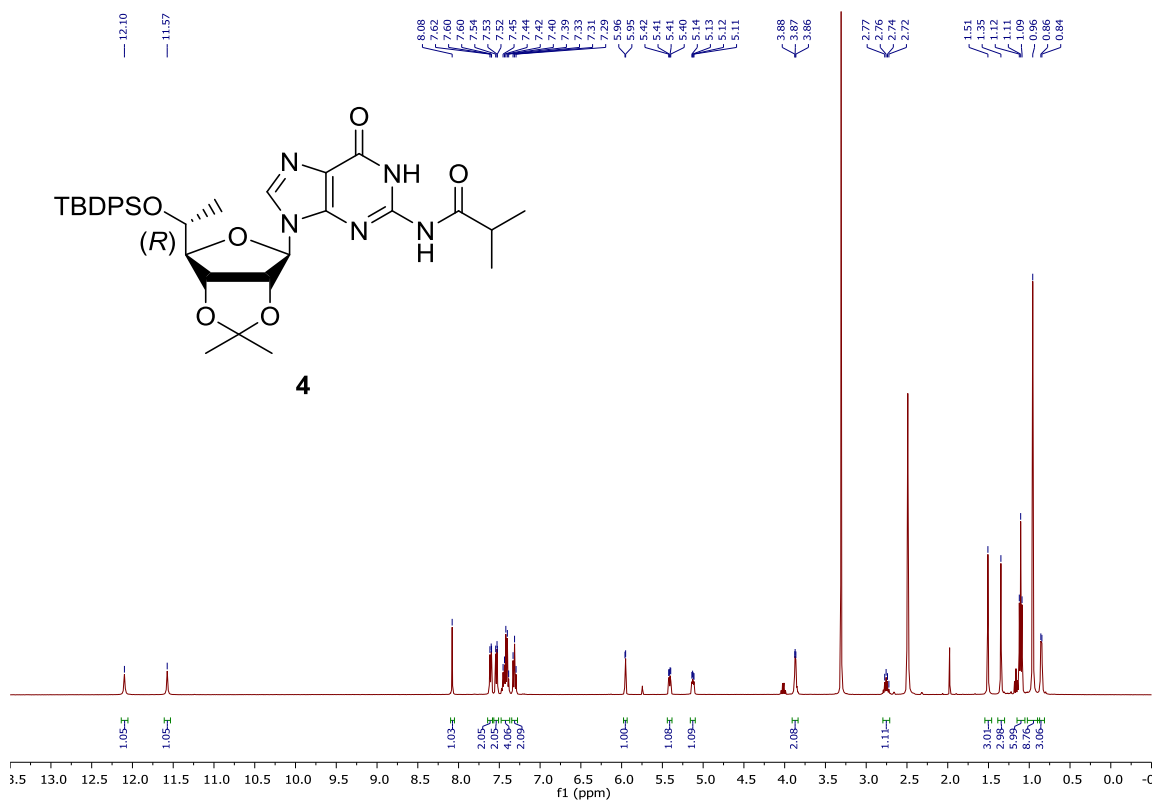

<sup>13</sup>C NMR spectrum of compound **4** in DMSO-d<sub>6</sub>

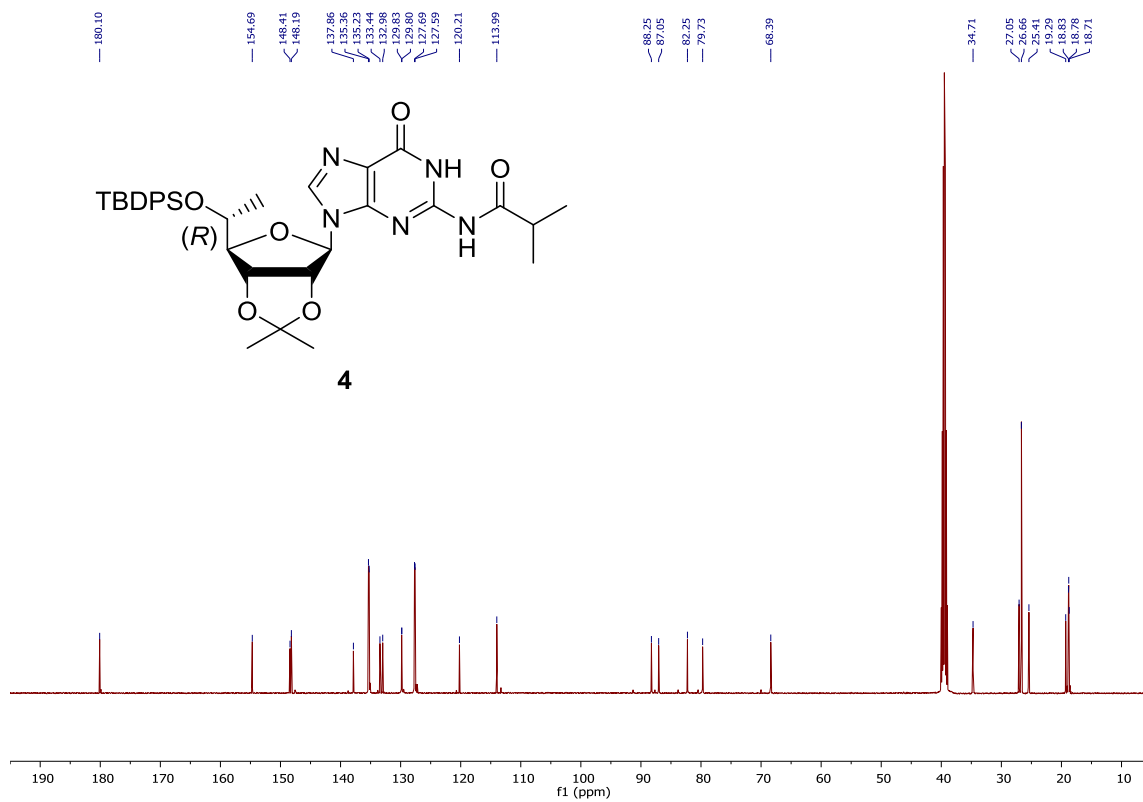



<sup>1</sup>H NMR spectrum of compound **5** in DMSO-d<sub>6</sub>

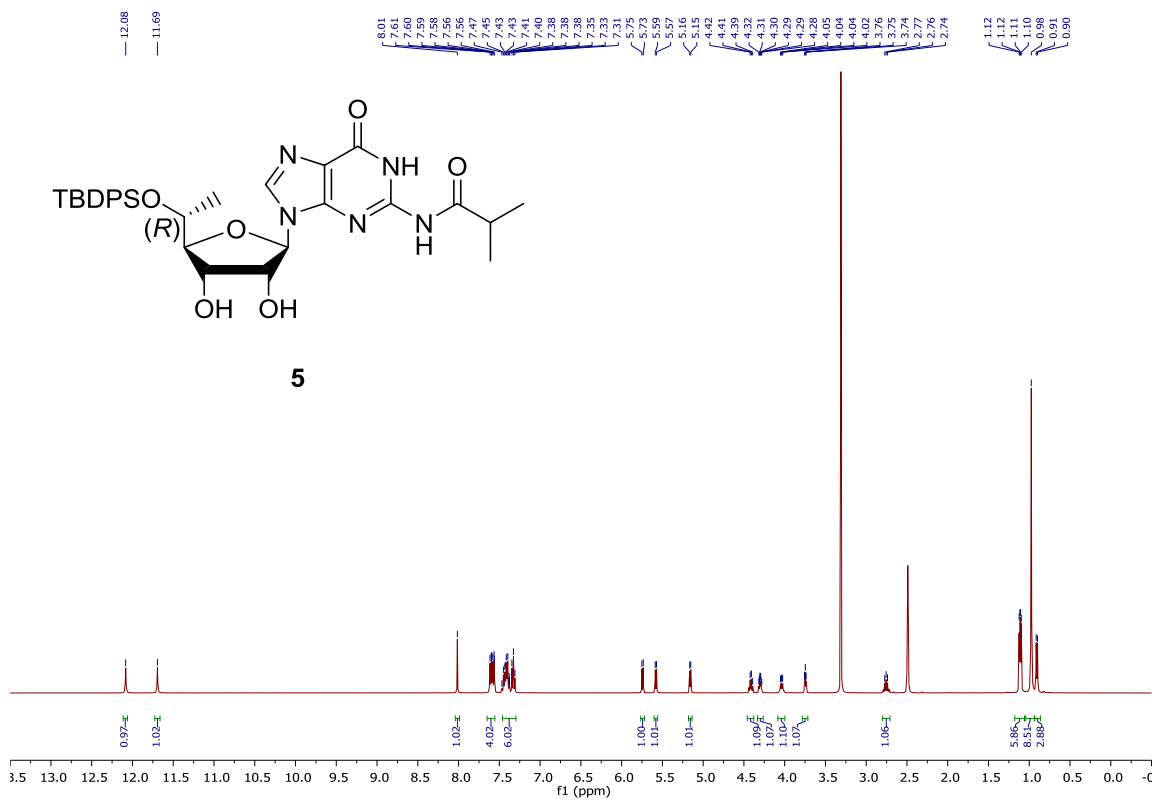

<sup>13</sup>C NMR spectrum of compound **5** in DMSO-d<sub>6</sub>

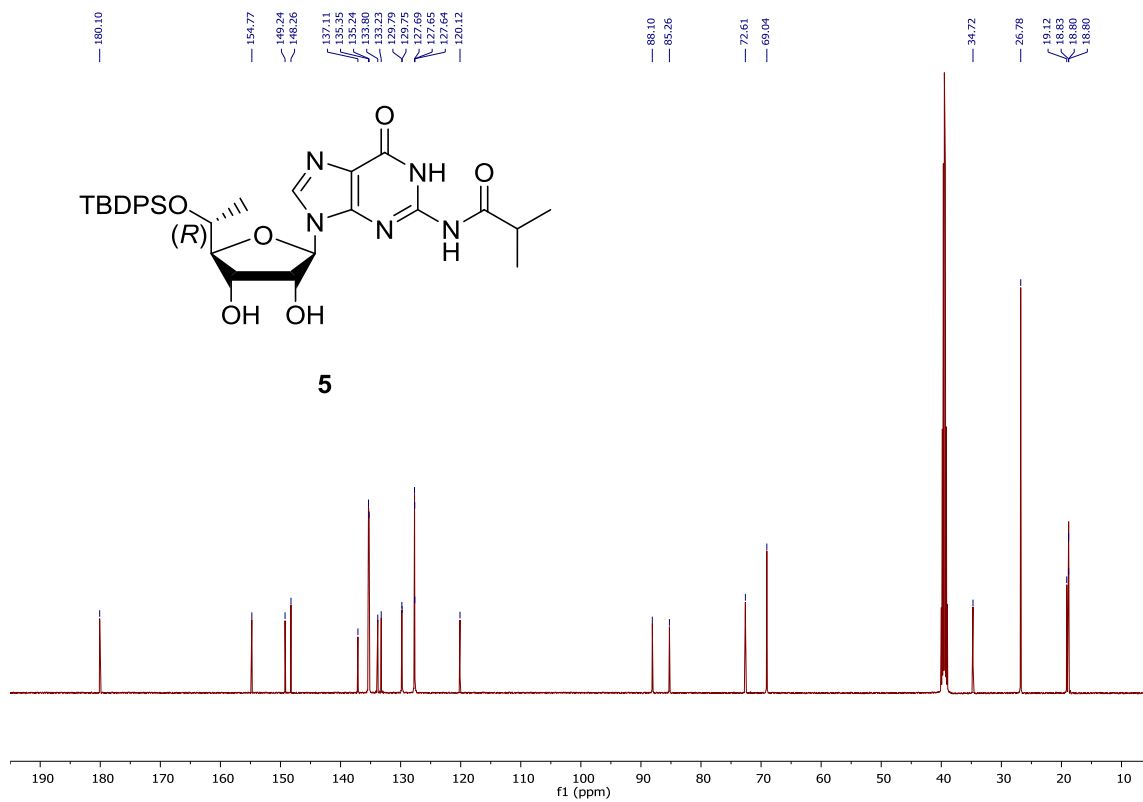

<sup>1</sup>H NMR spectrum of compound **6** in DMSO-d<sub>6</sub>

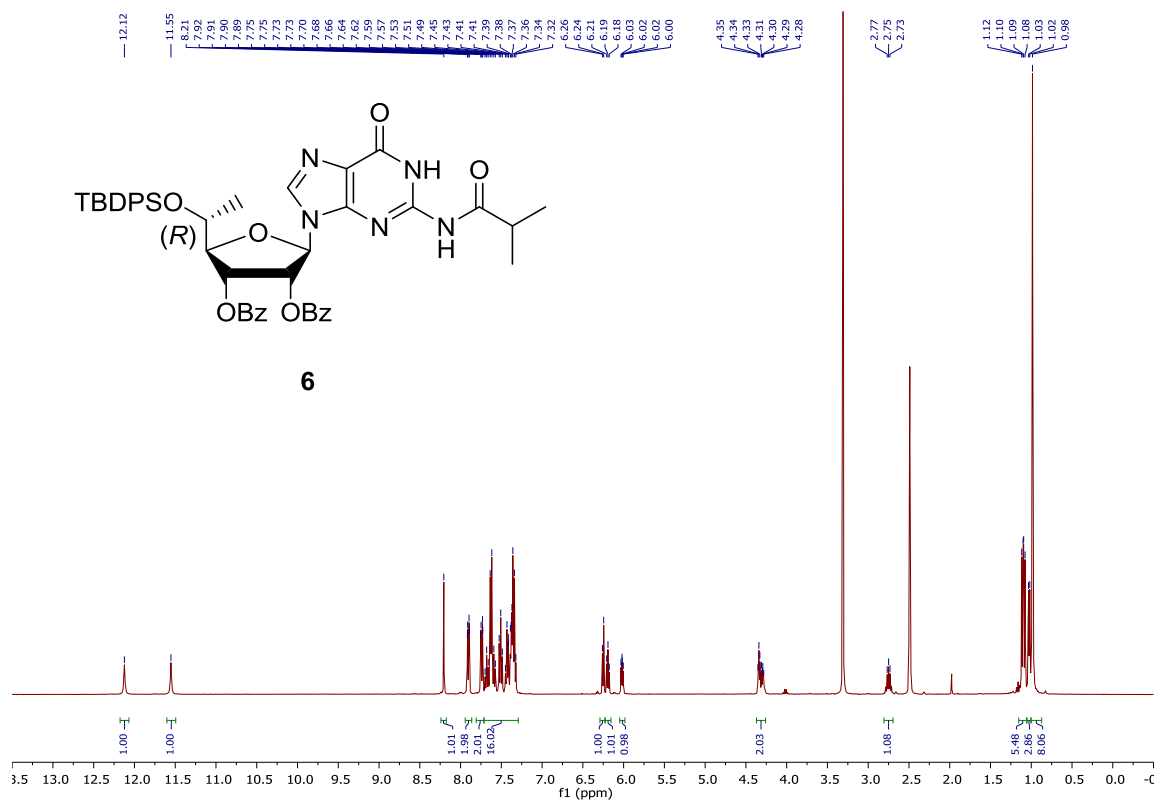

<sup>13</sup>C NMR spectrum of compound **6** in DMSO-d<sub>6</sub>

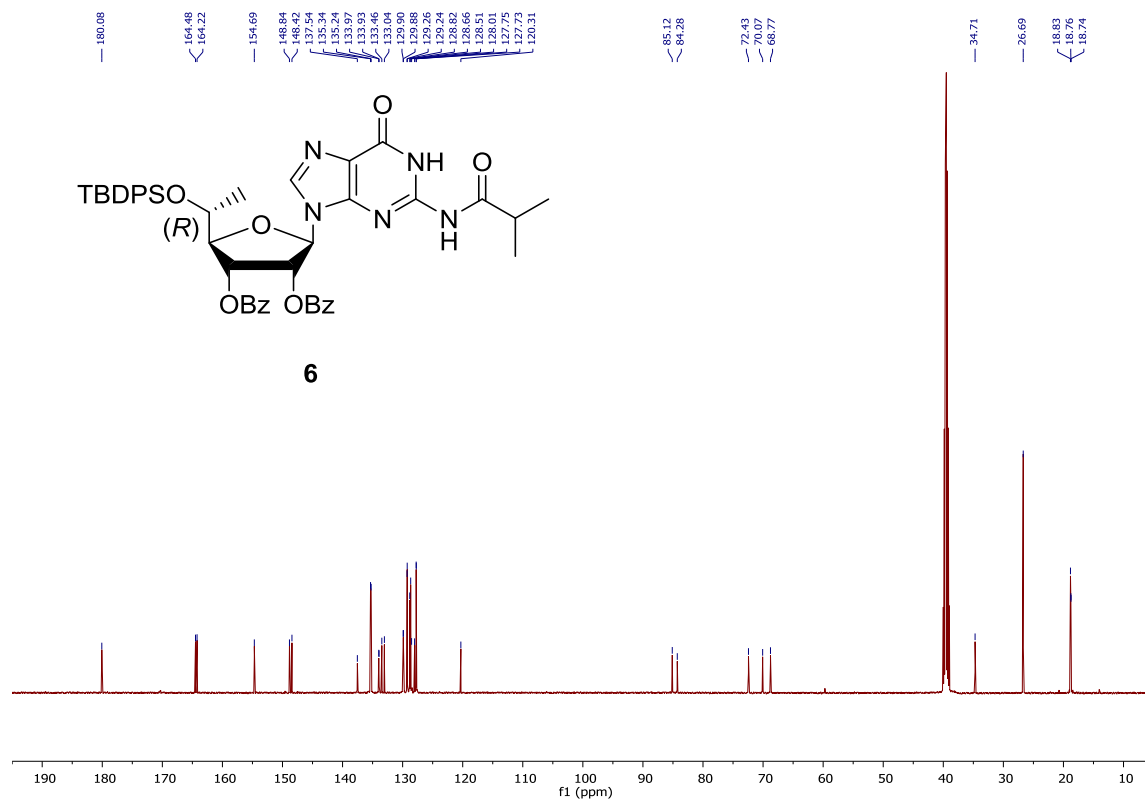

<sup>1</sup>H NMR spectrum of compound **7** in DMSO-d<sub>6</sub>

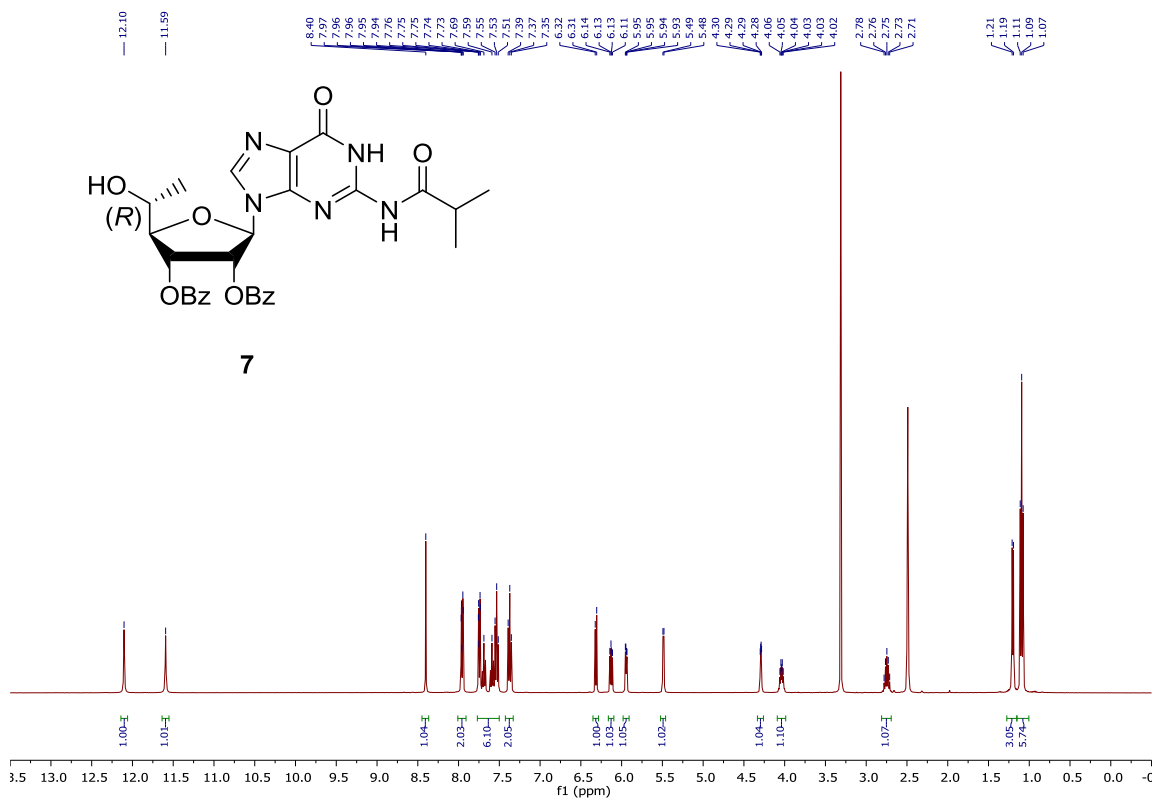

<sup>13</sup>C NMR spectrum of compound **7** in DMSO-d<sub>6</sub>

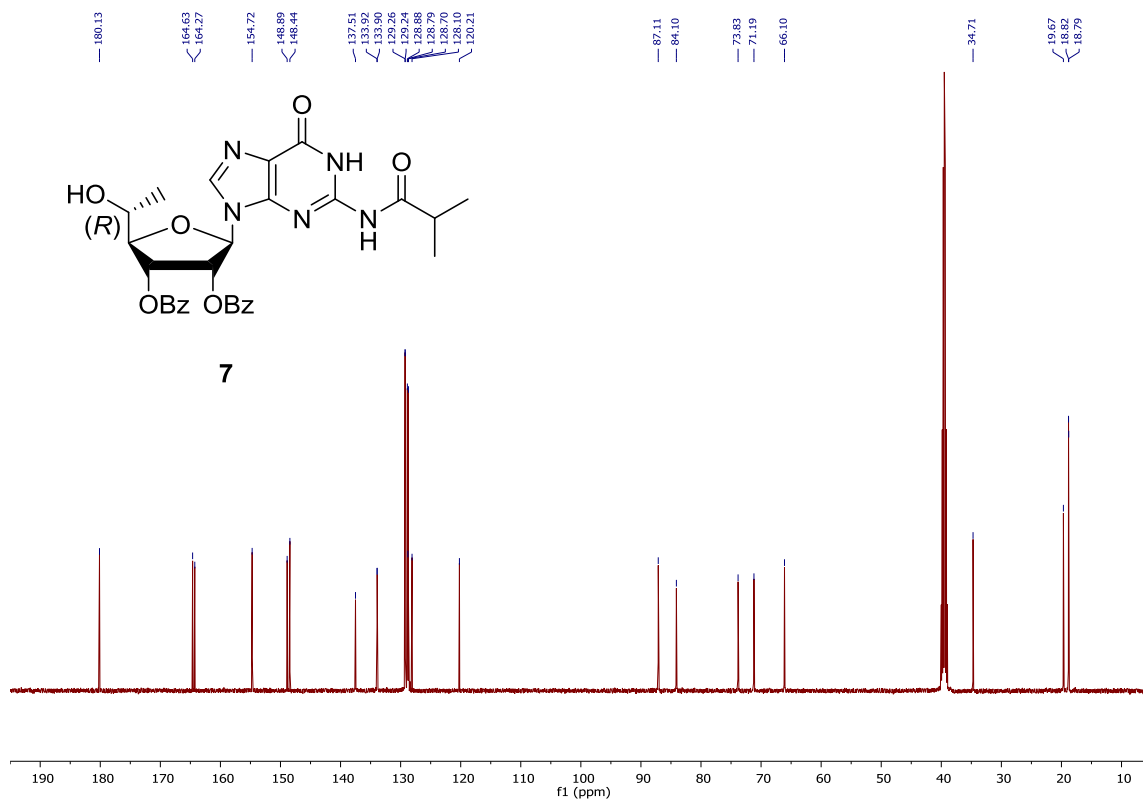

<sup>1</sup>H NMR spectrum of compound **8** in DMSO-d<sub>6</sub>

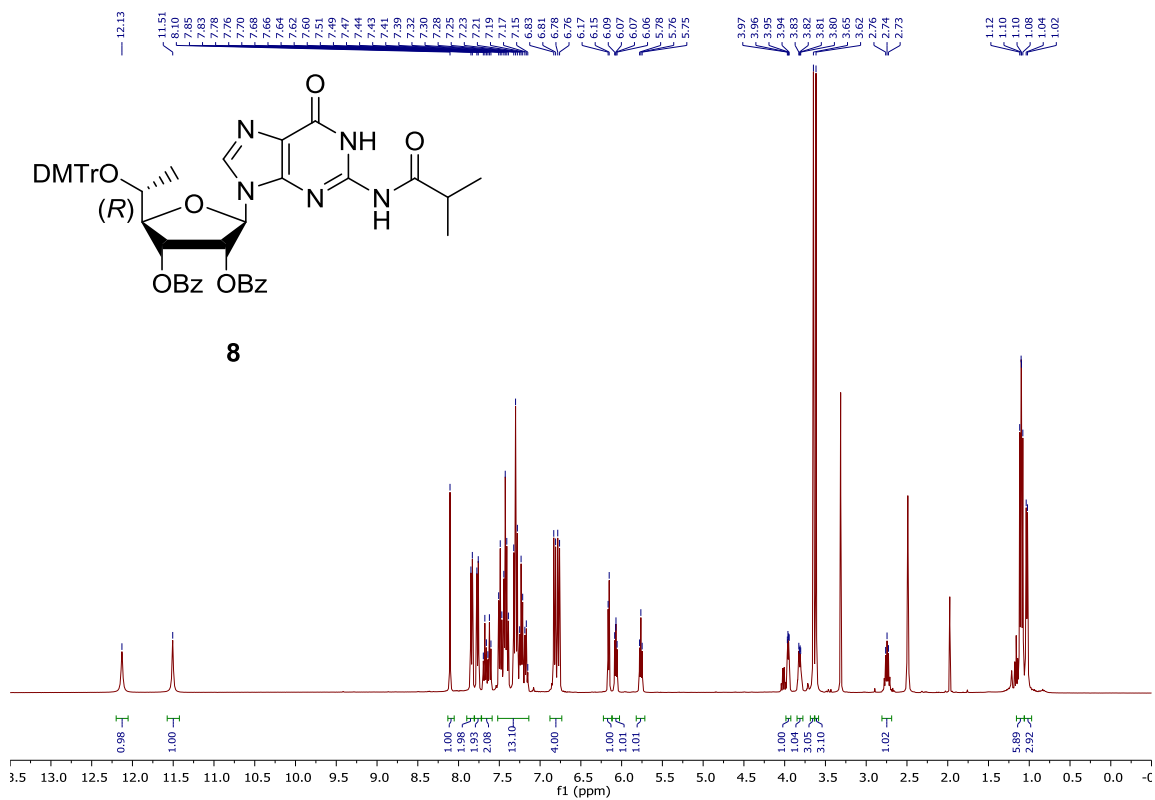

<sup>13</sup>C NMR spectrum of compound **8** in DMSO-d<sub>6</sub>

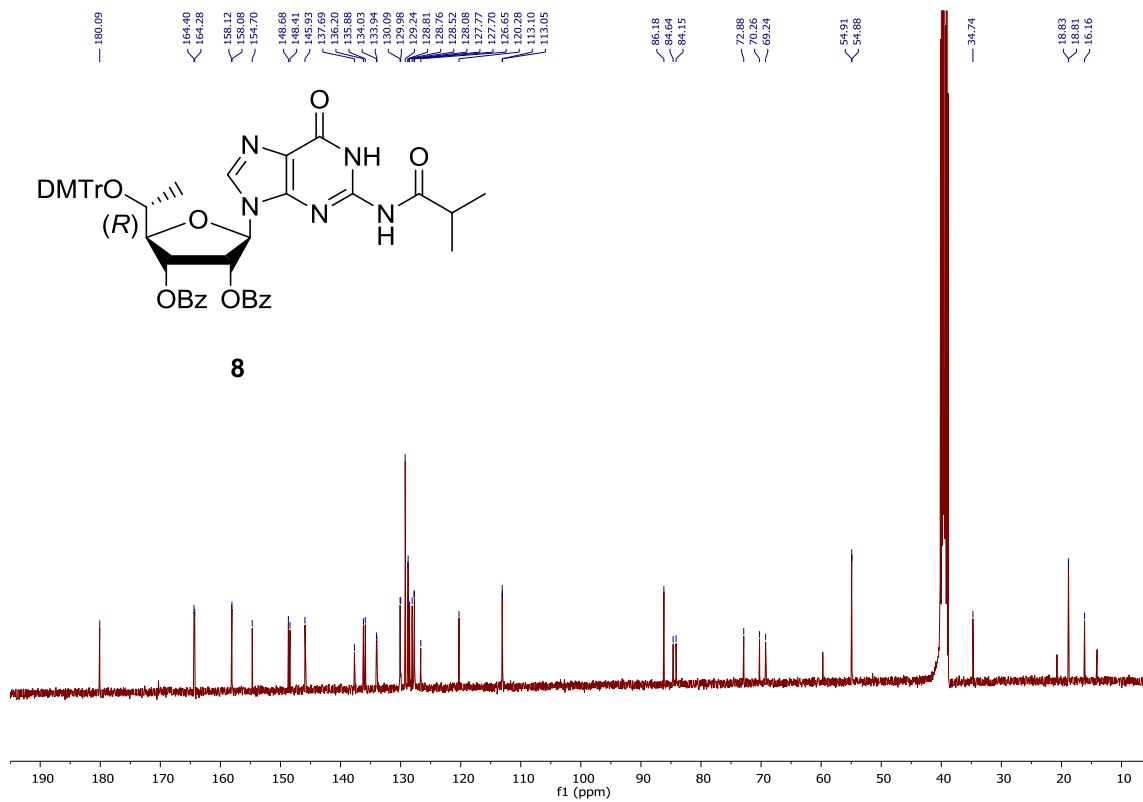

<sup>1</sup>H NMR spectrum of compound **9** in DMSO-d<sub>6</sub>

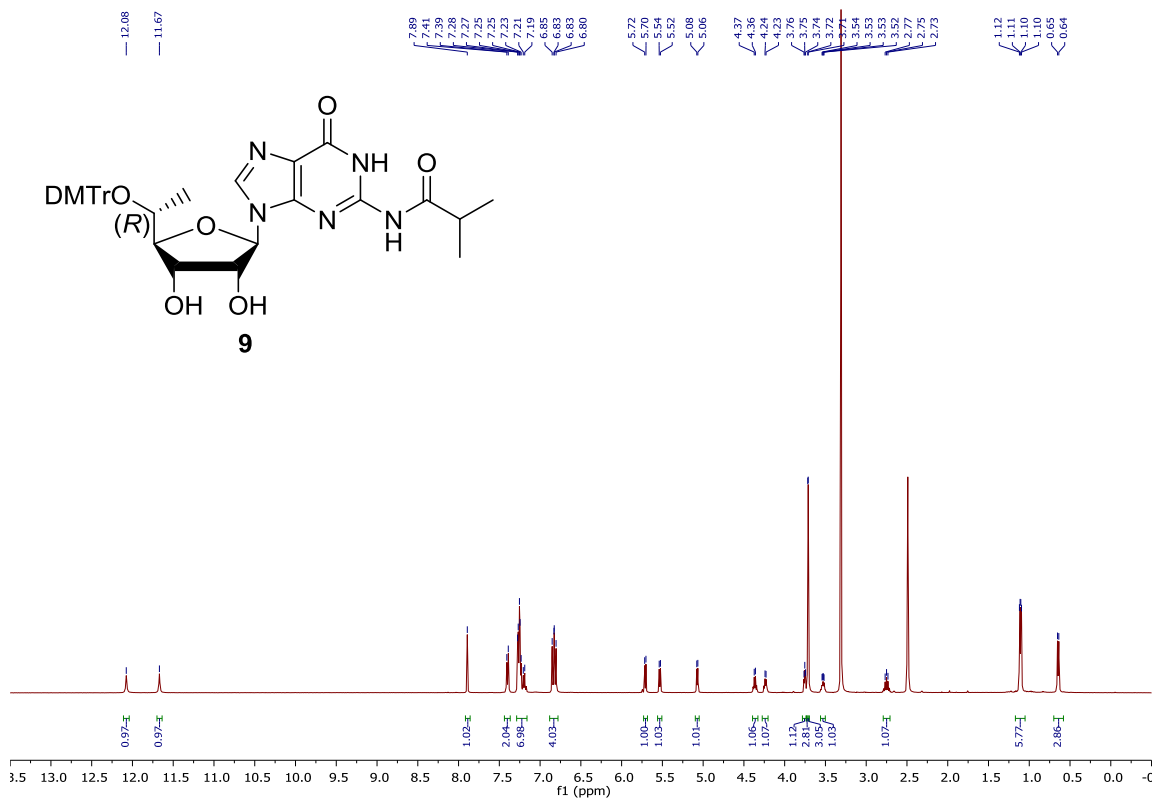

<sup>13</sup>C NMR spectrum of compound **9** in DMSO-d<sub>6</sub>

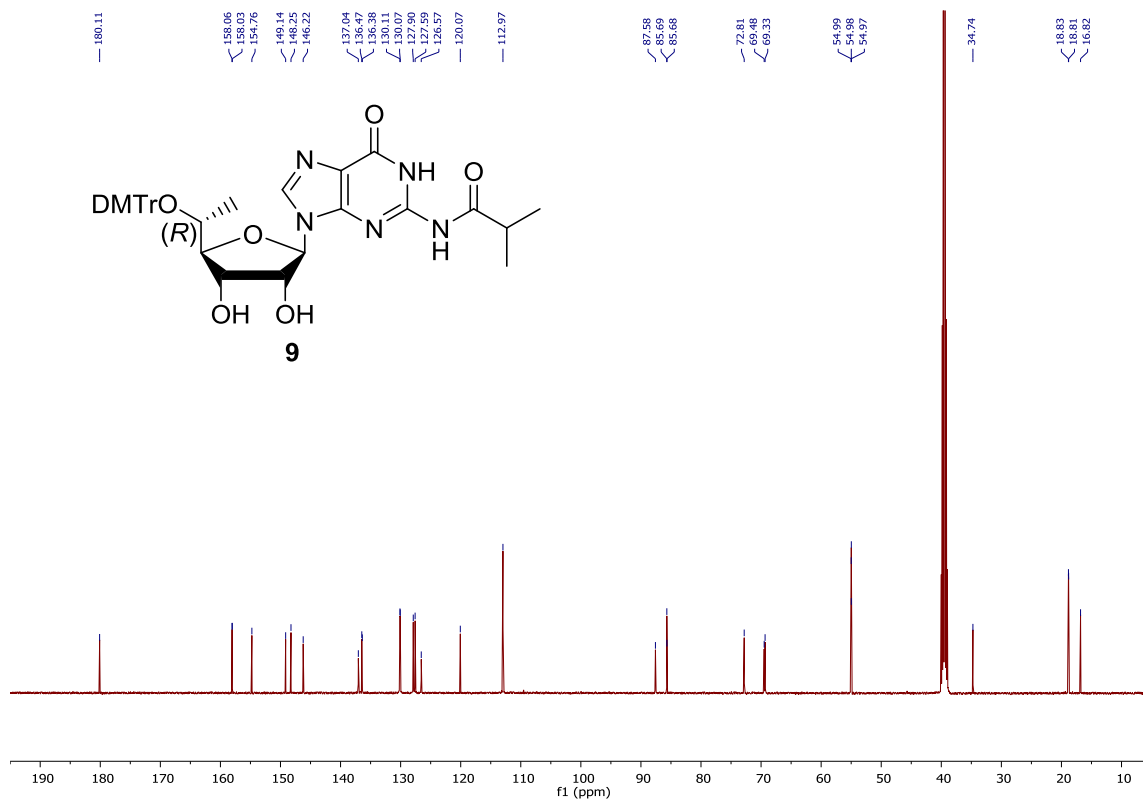

# <sup>1</sup>H NMR spectrum of compound 10 in DMSO-d6

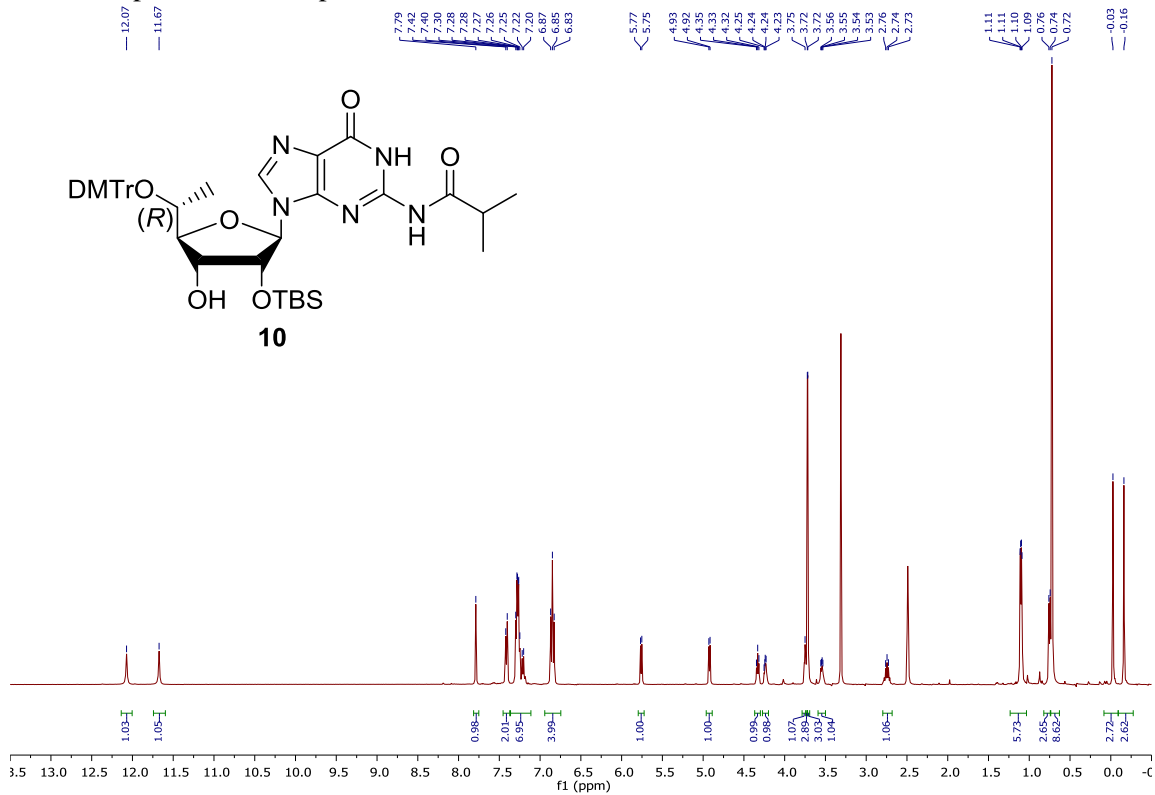

# <sup>13</sup>C NMR spectrum of compound 10 in DMSO-d6

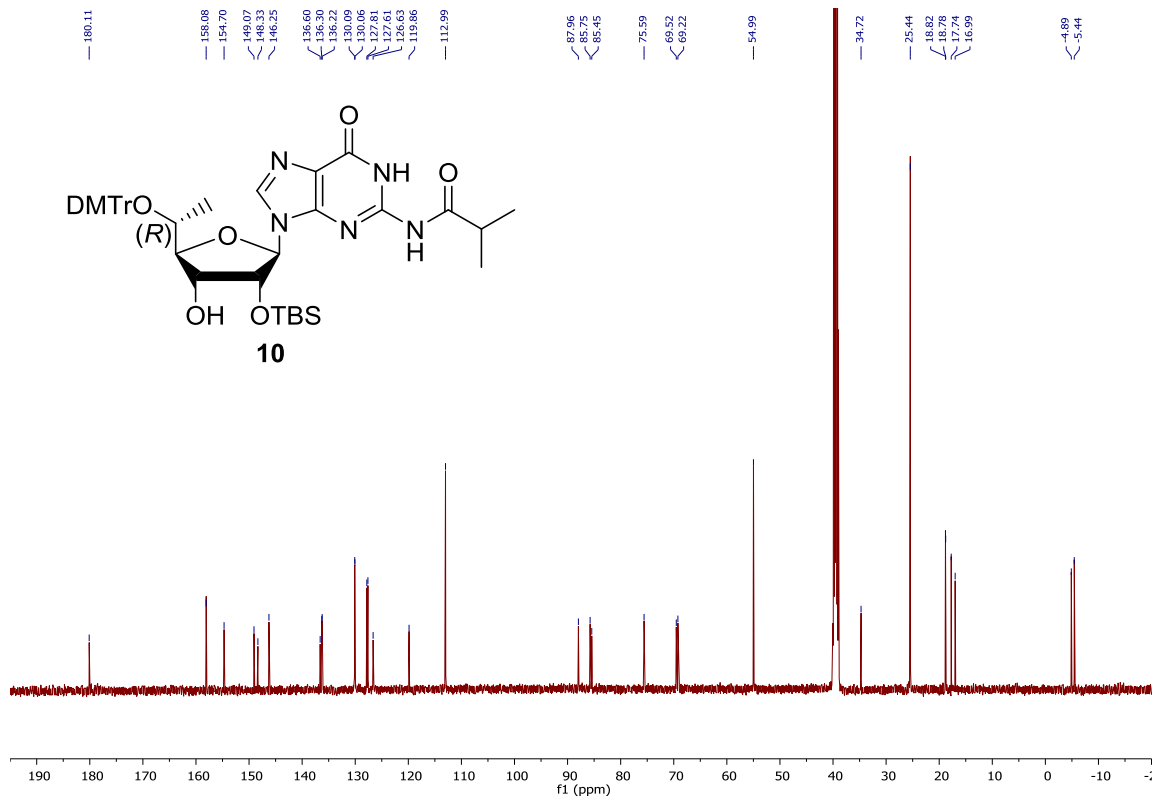

<sup>1</sup>H NMR spectrum of compound 11 in CDCl<sub>3</sub>

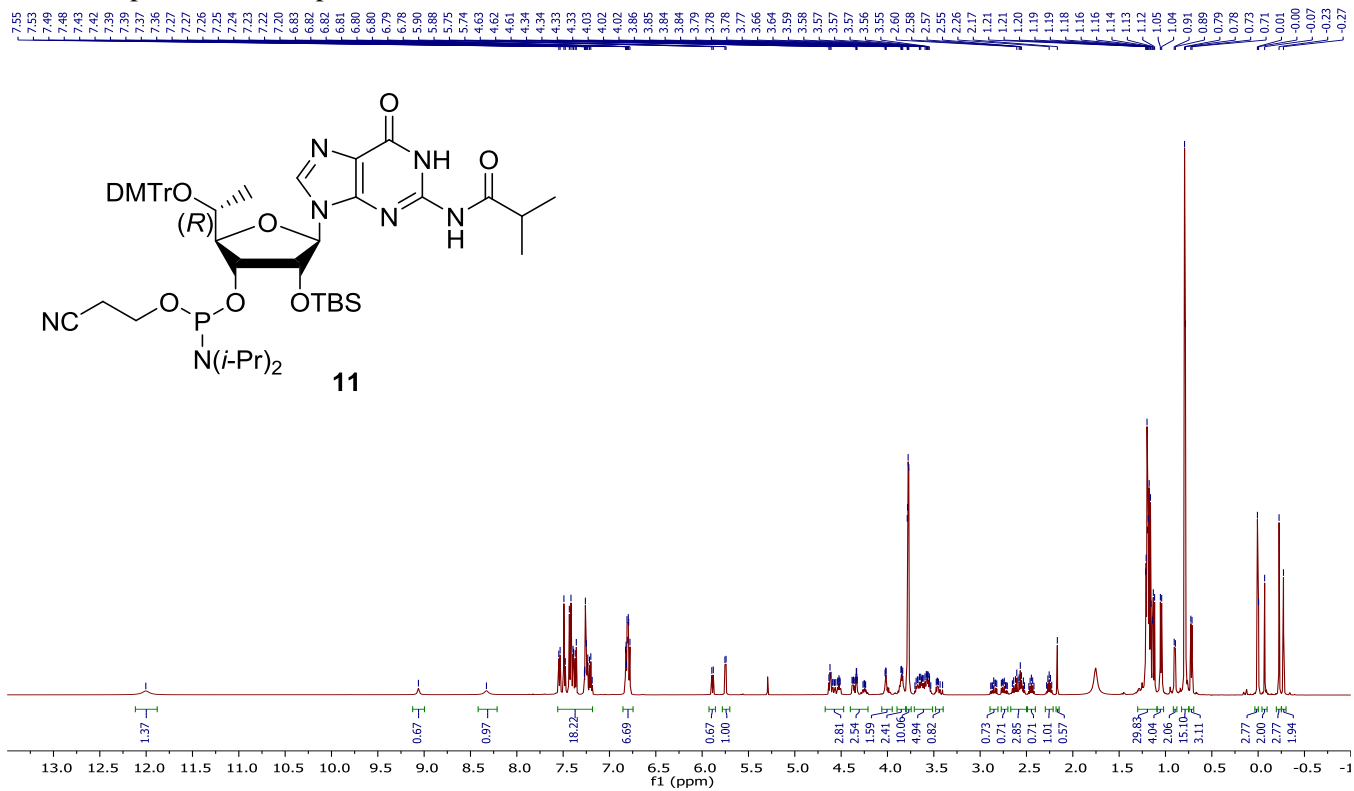

<sup>31</sup>P NMR spectrum of compound 11 in CDCl<sub>3</sub>

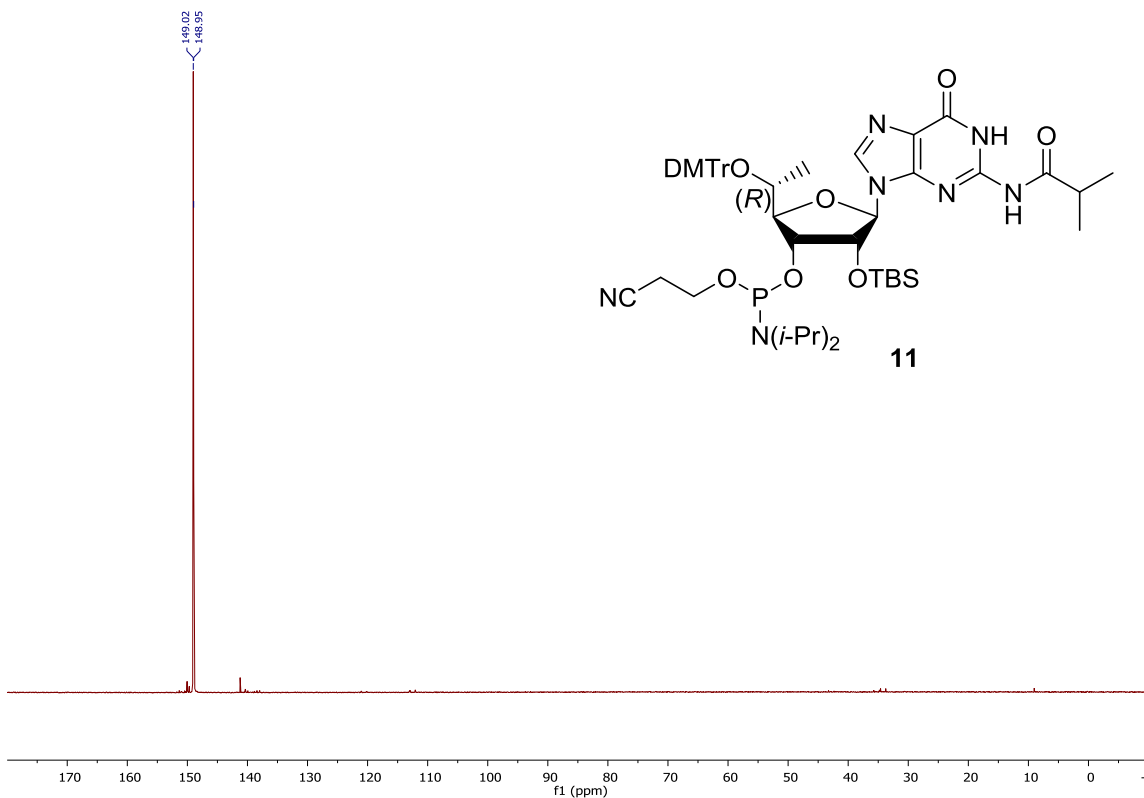

<sup>13</sup>C NMR spectrum of compound 11 in CDCl<sub>3</sub>

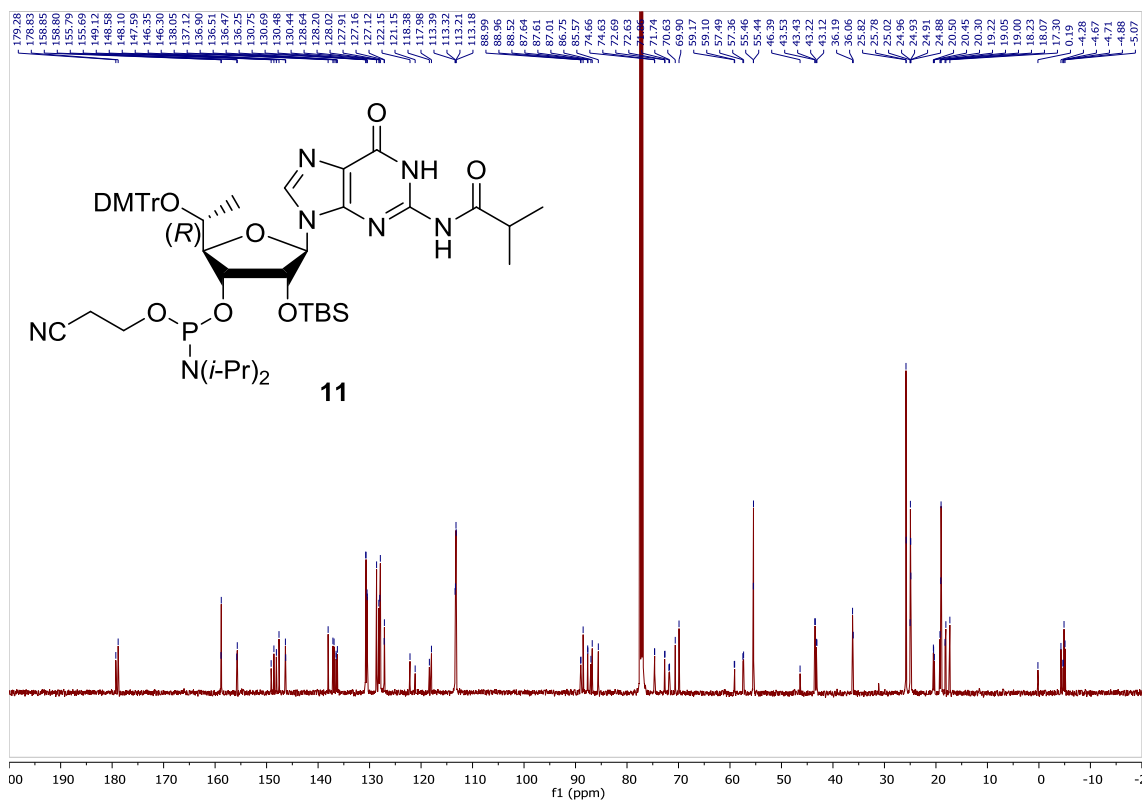



<sup>1</sup>H NMR spectrum of compound 13 in DMSO-d6

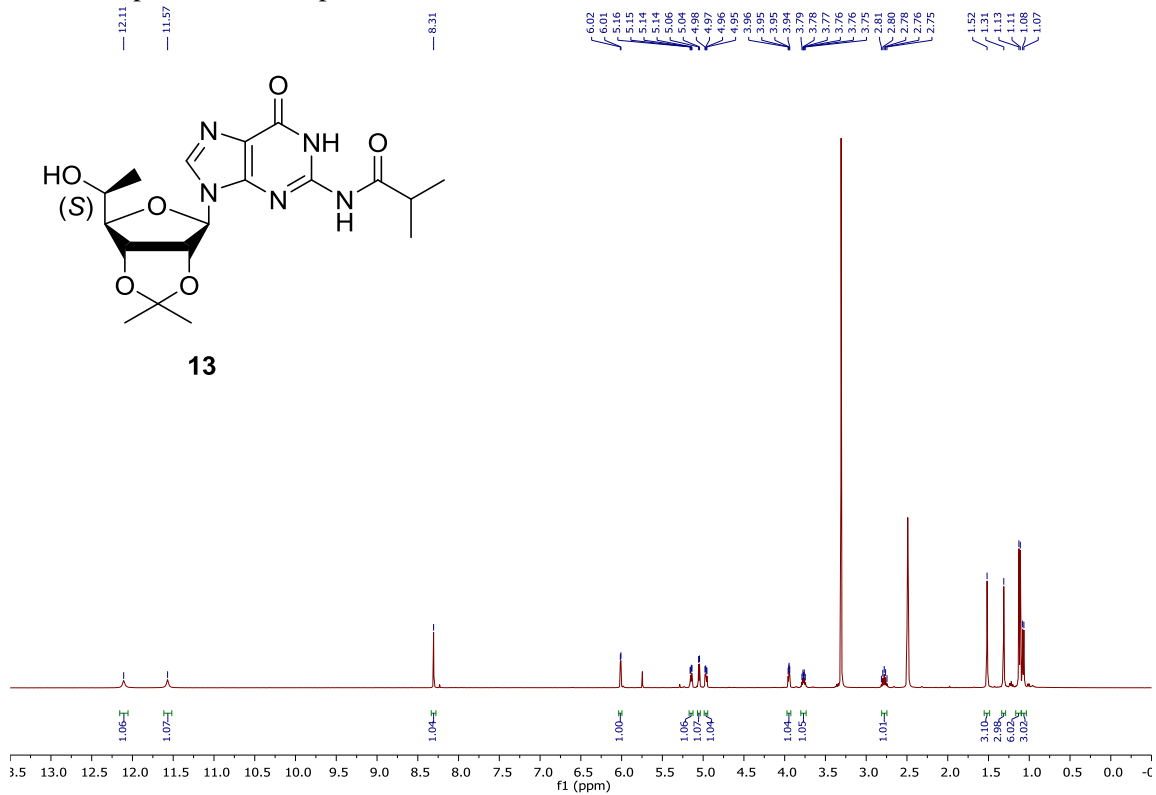

<sup>13</sup>C NMR spectrum of compound 13 in DMSO-d6

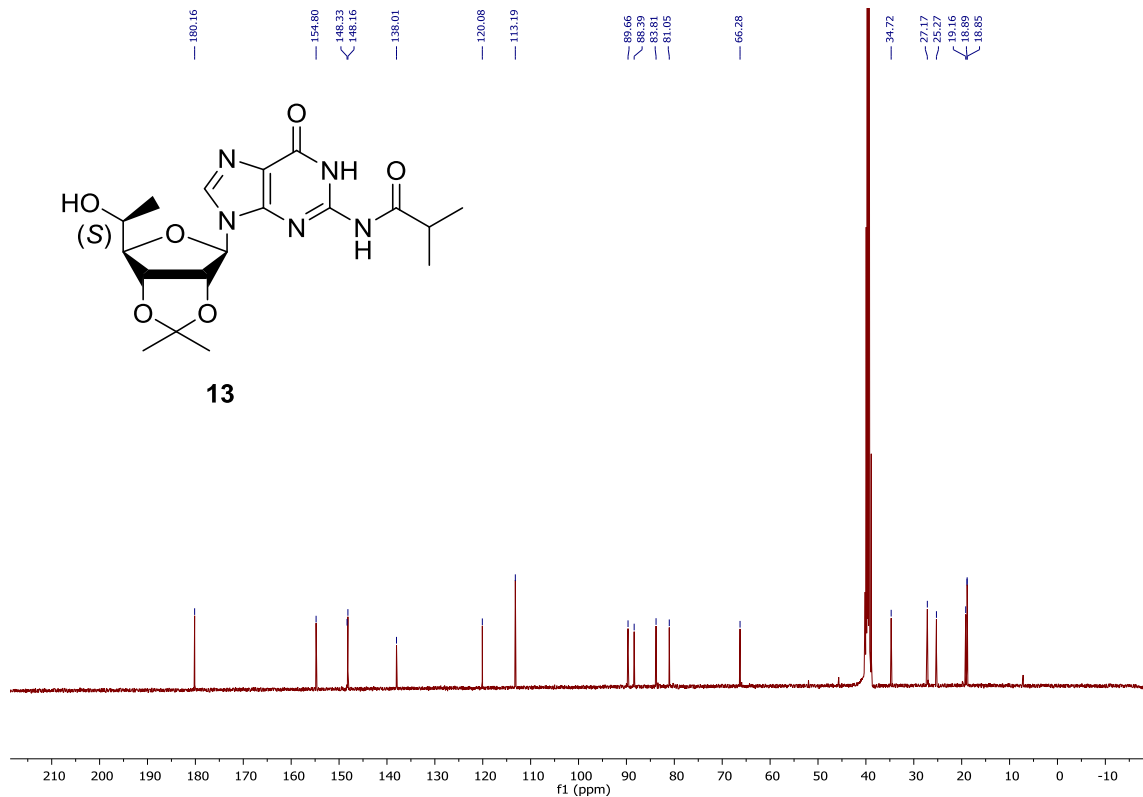

<sup>1</sup>H NMR spectrum of compound 14 in DMSO-d6

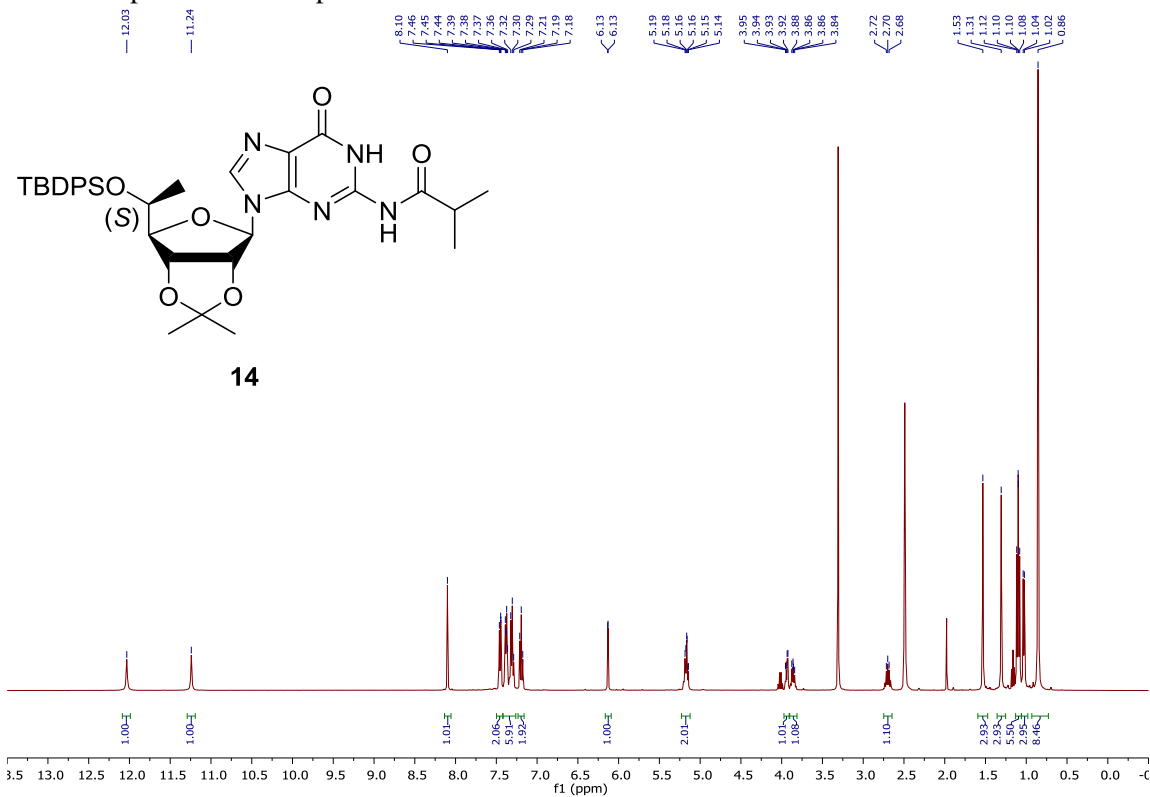

<sup>13</sup>C NMR spectrum of compound 14 in DMSO-d6

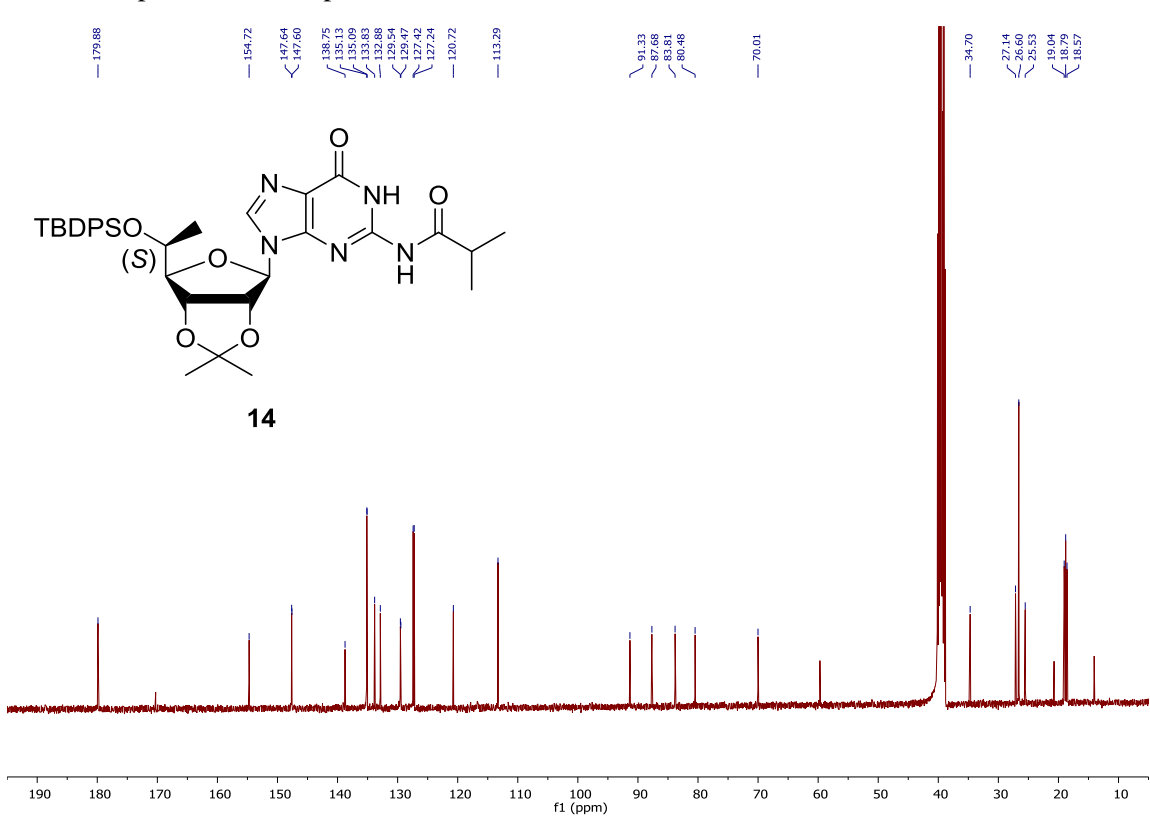

<sup>1</sup>H NMR spectrum of compound 15 in DMSO-d6

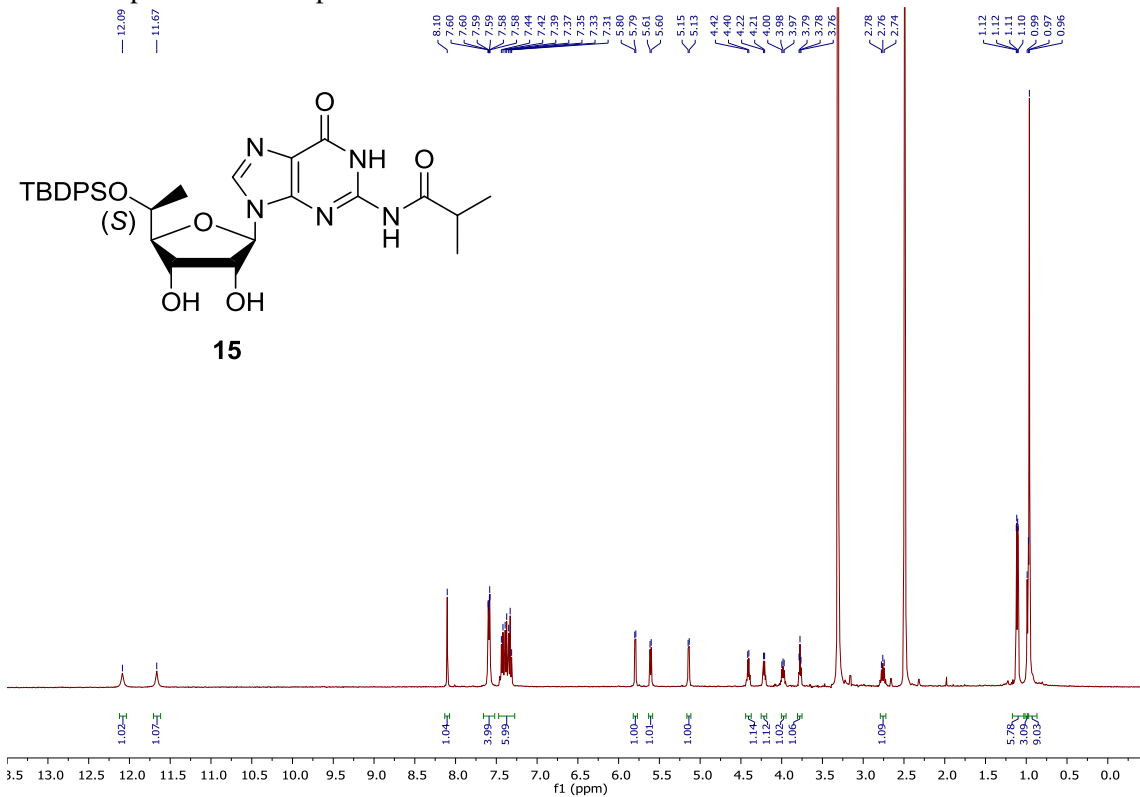

<sup>13</sup>C NMR spectrum of compound 15 in DMSO-d6

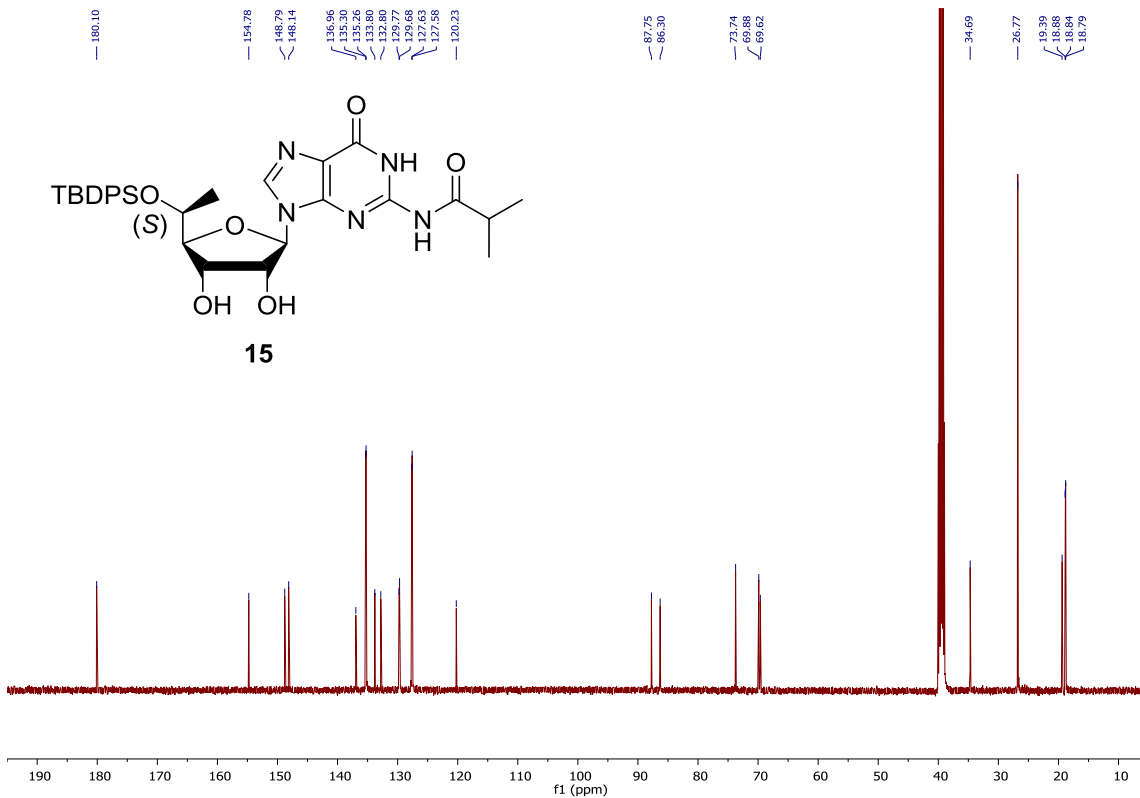

<sup>1</sup>H NMR spectrum of compound 16 in DMSO-d6

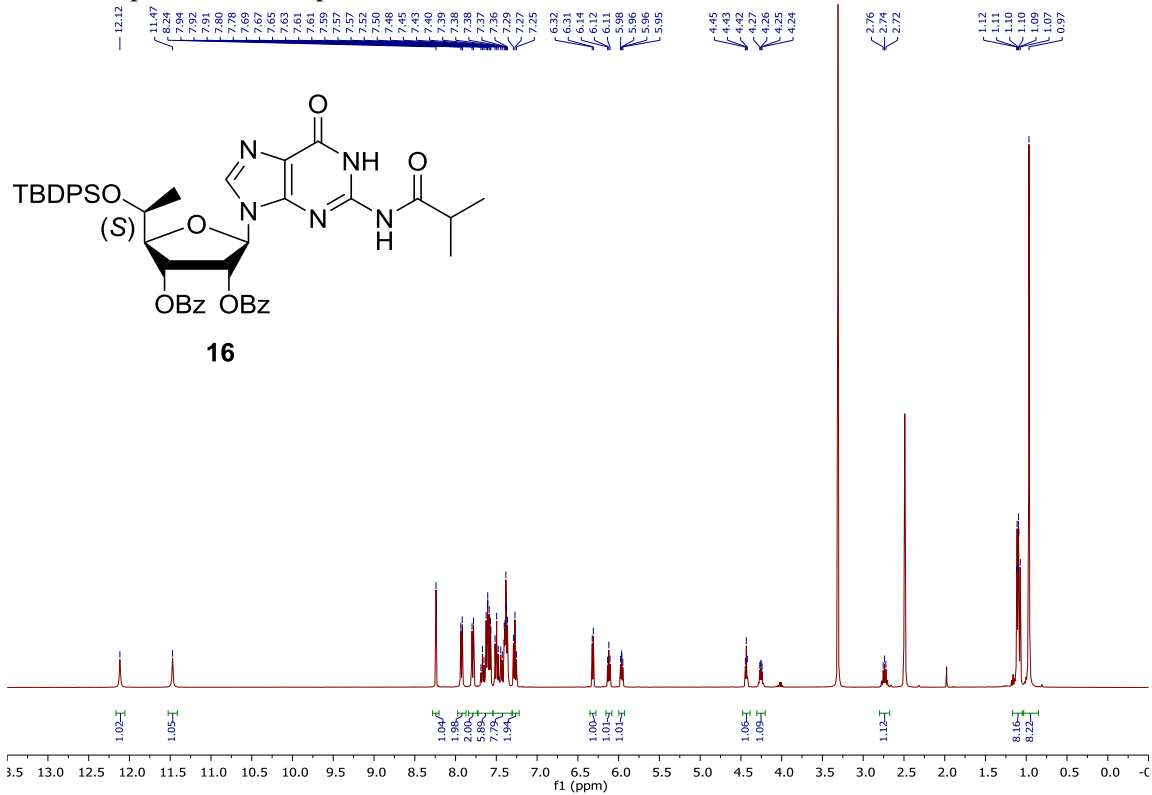

<sup>13</sup>C NMR spectrum of compound 16 in DMSO-d6

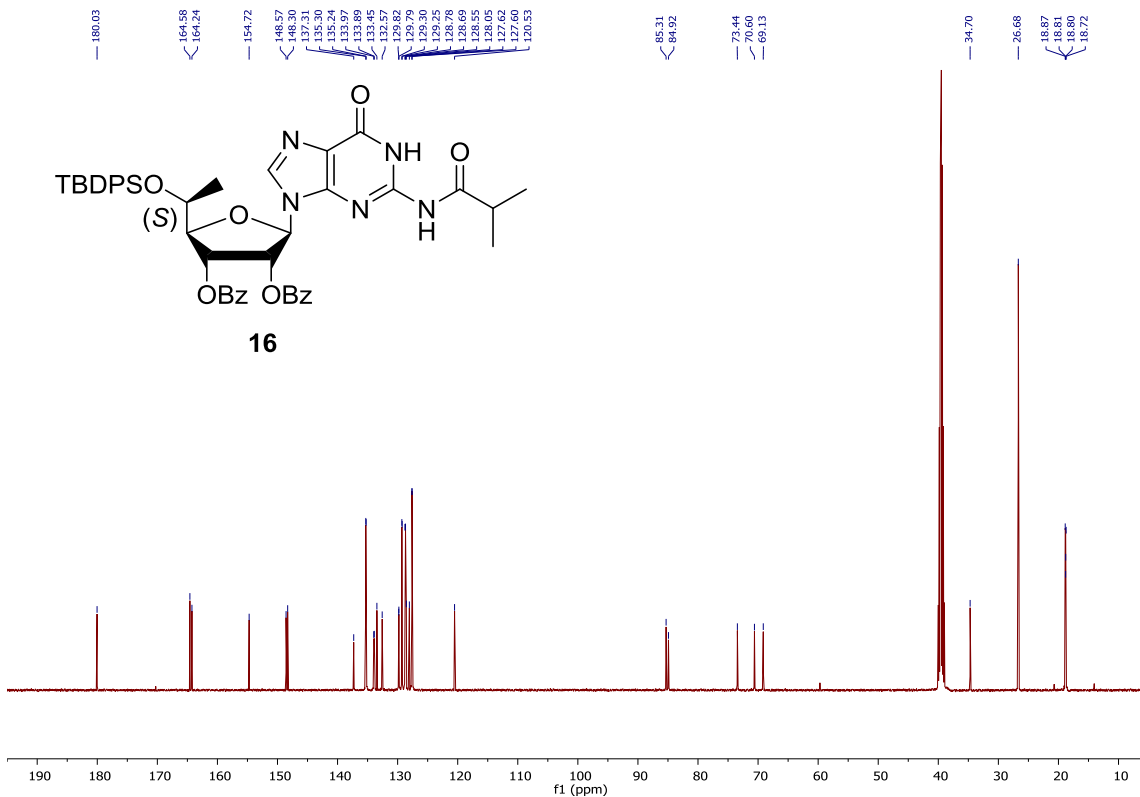

<sup>1</sup>H NMR spectrum of compound 17 in DMSO-d6

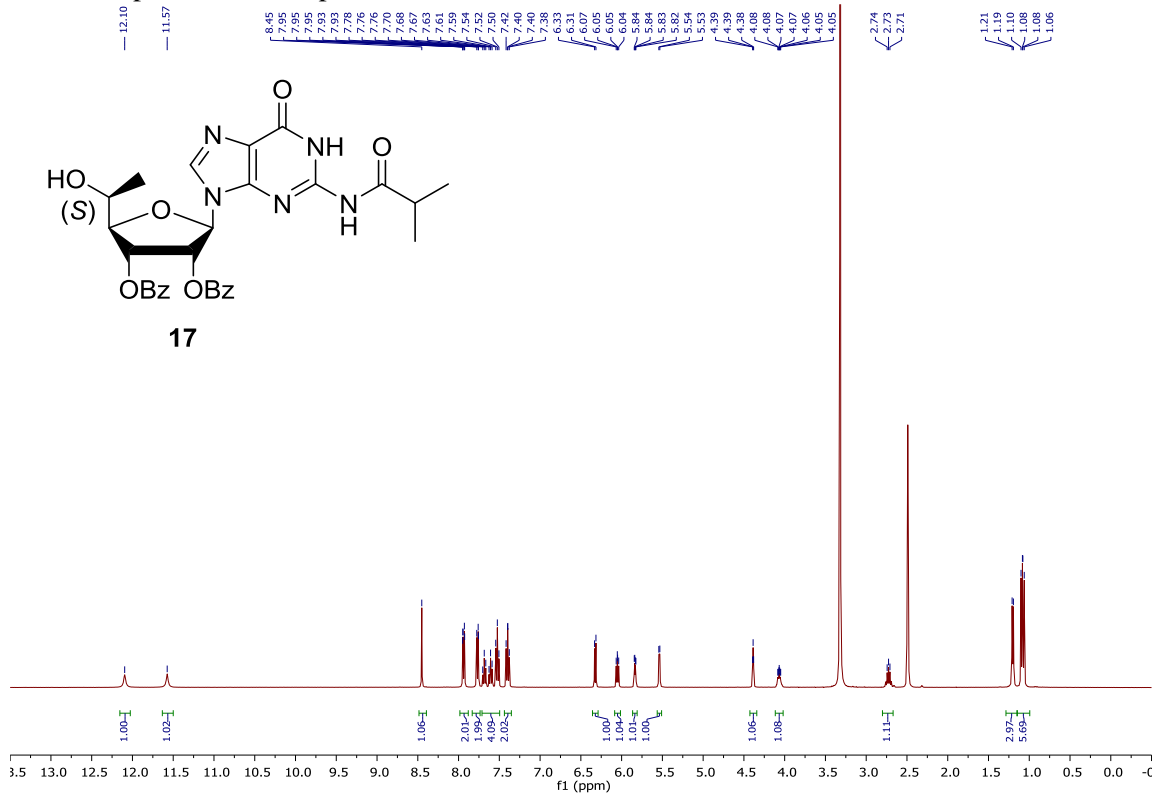

<sup>13</sup>C NMR spectrum of compound 17 in DMSO-d6

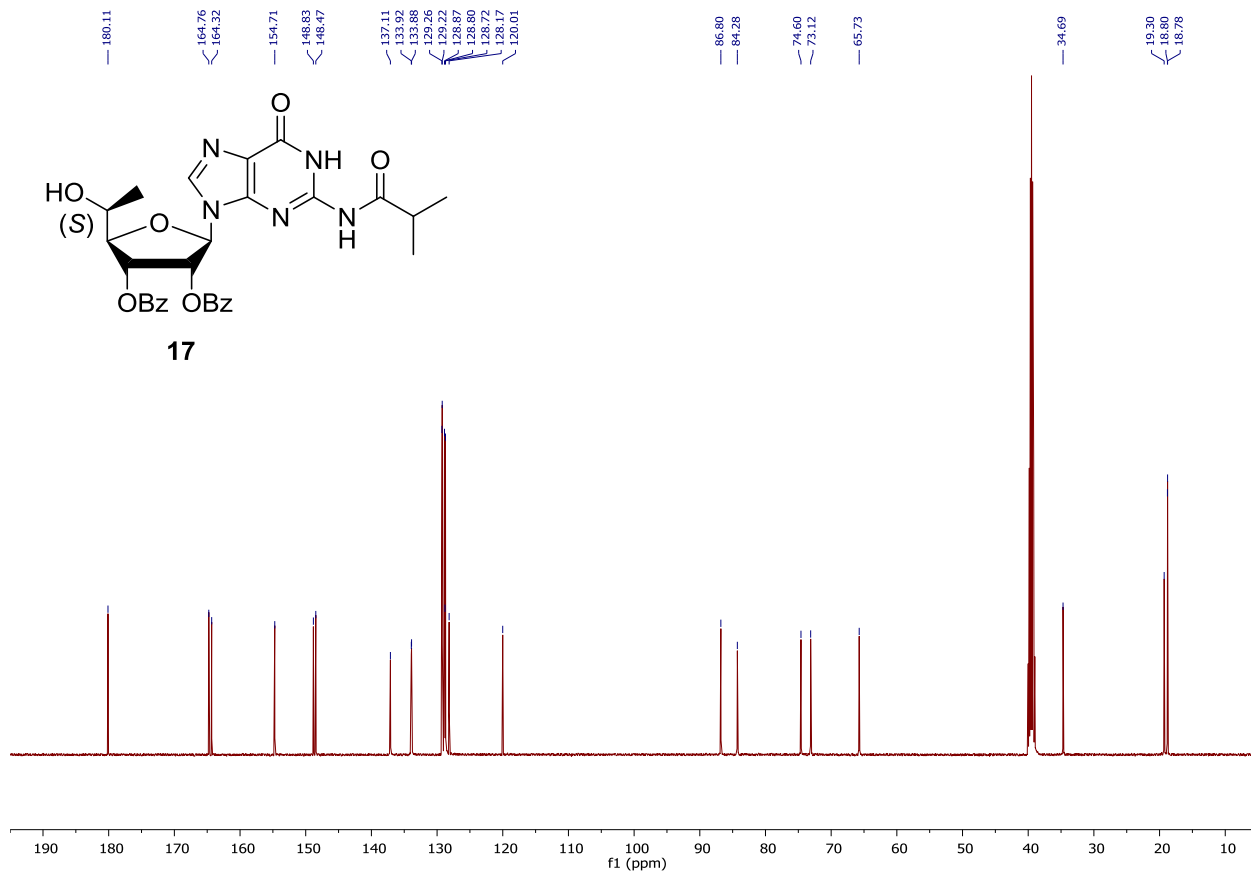

<sup>1</sup>H NMR spectrum of compound 18 in DMSO-d6

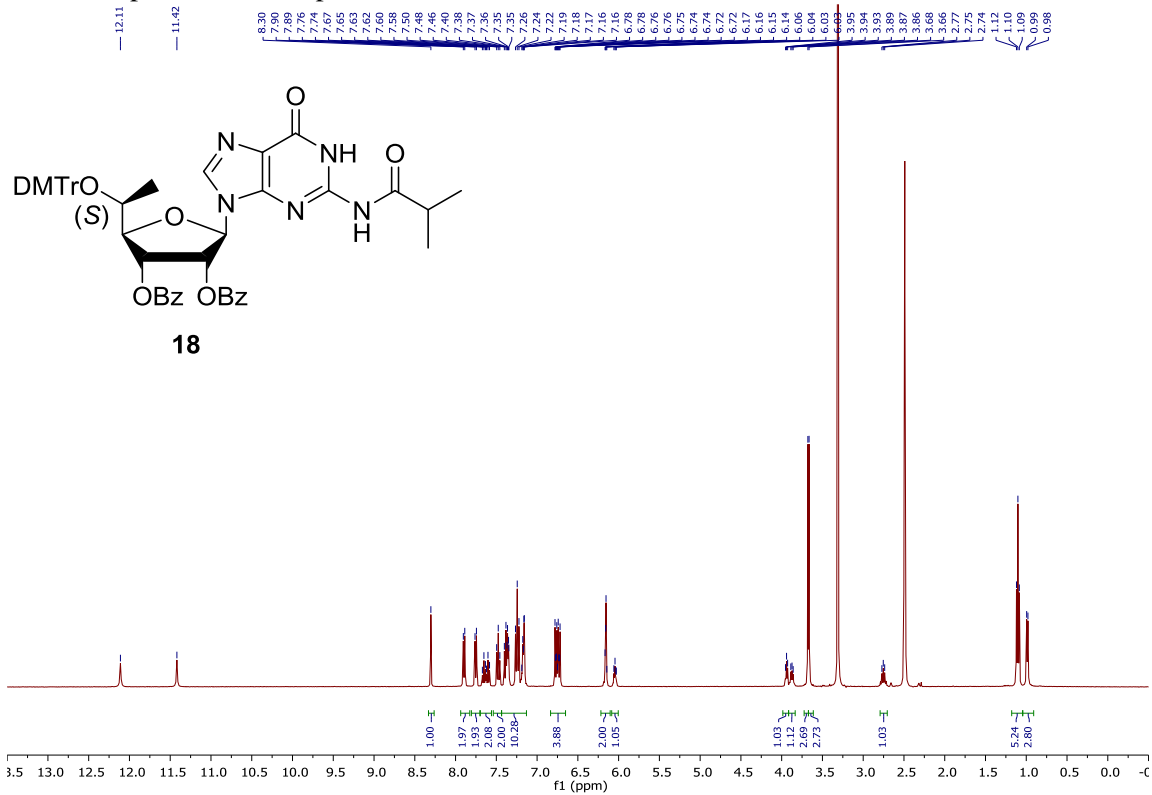

<sup>13</sup>C NMR spectrum of compound 18 in DMSO-d6

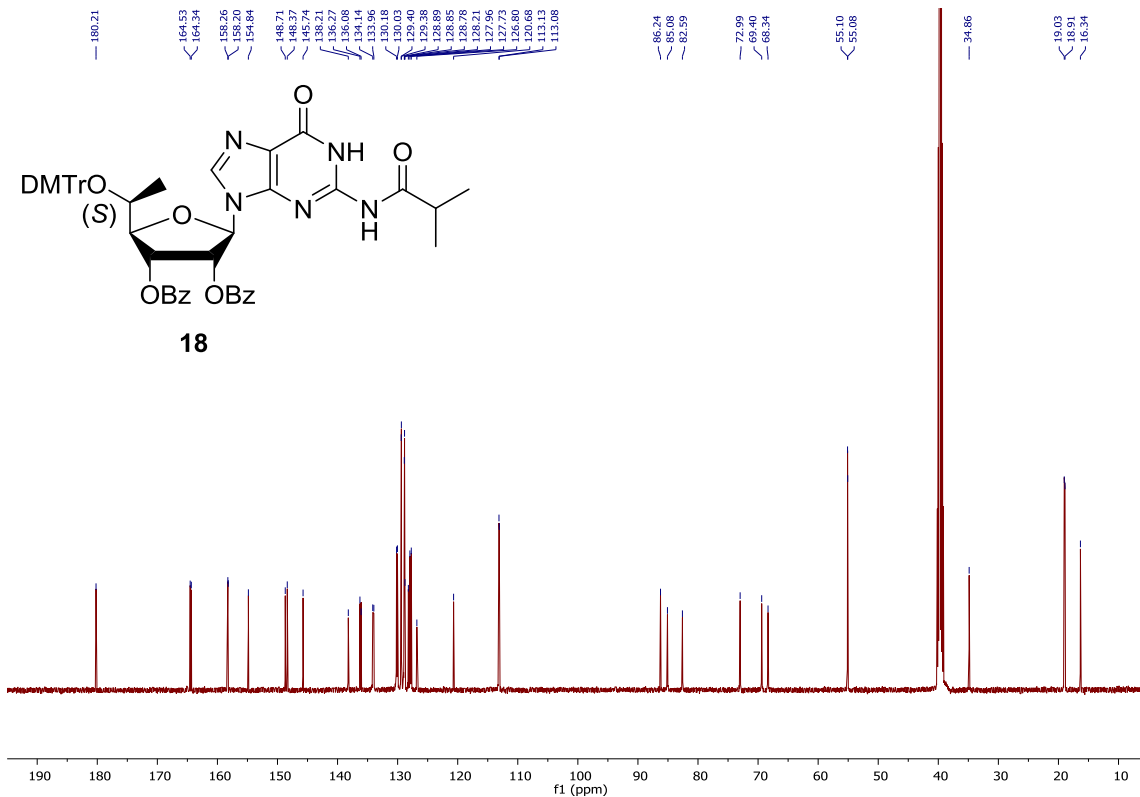

<sup>1</sup>H NMR spectrum of compound 19 in DMSO-d6

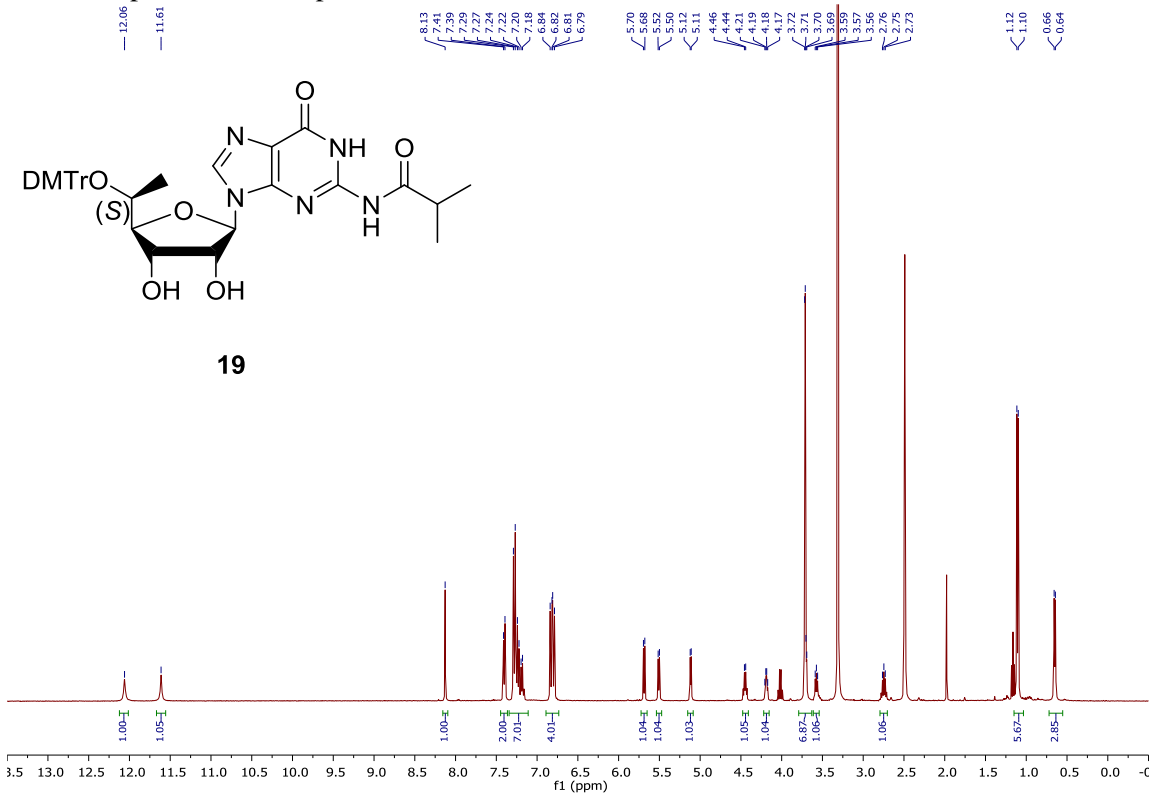

<sup>13</sup>C NMR spectrum of compound 19 in DMSO-d6

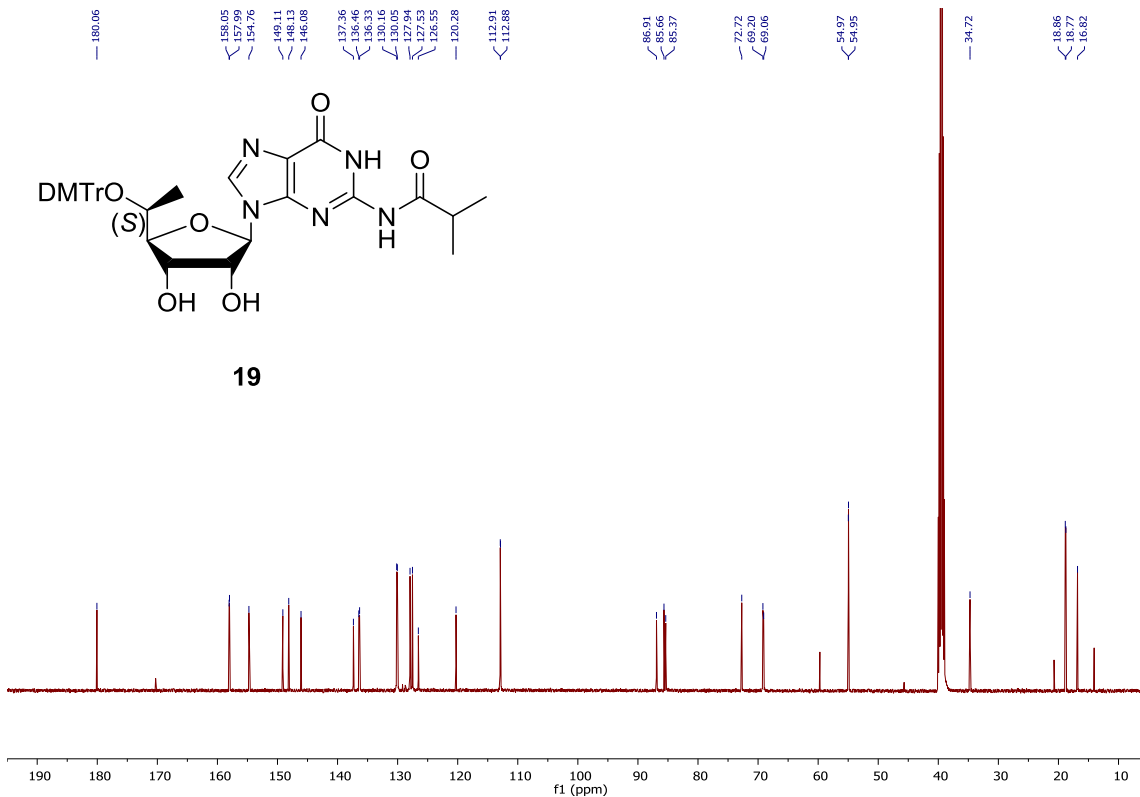

<sup>1</sup>H NMR spectrum of compound 20 in DMSO-d6

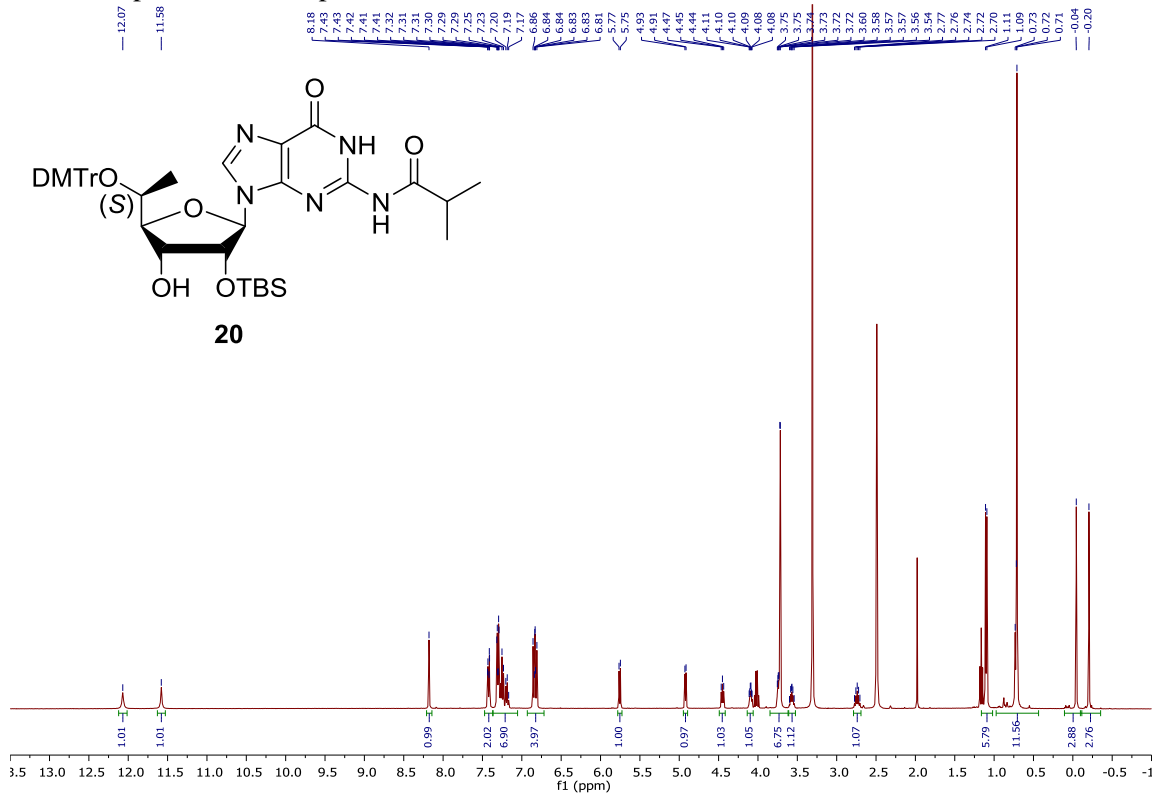

<sup>13</sup>C NMR spectrum of compound 20 in DMSO-d6

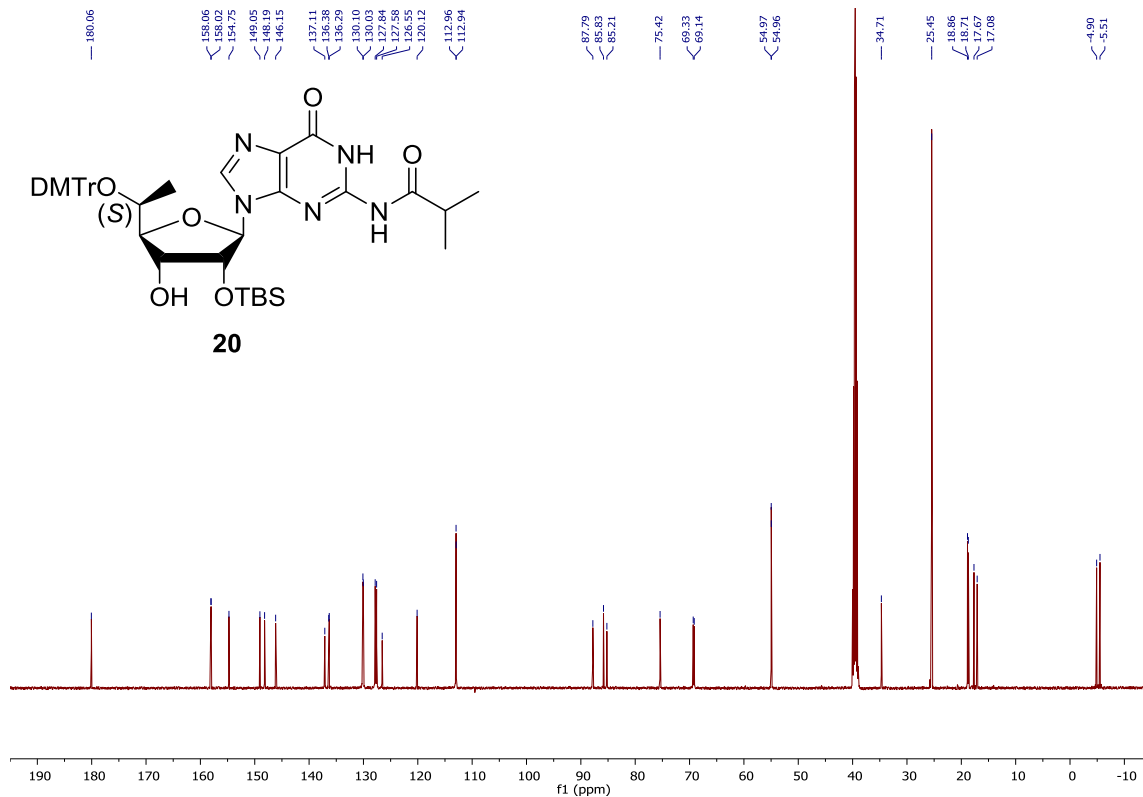



<sup>1</sup>H NMR spectrum of compound 21 in CDCl<sub>3</sub>

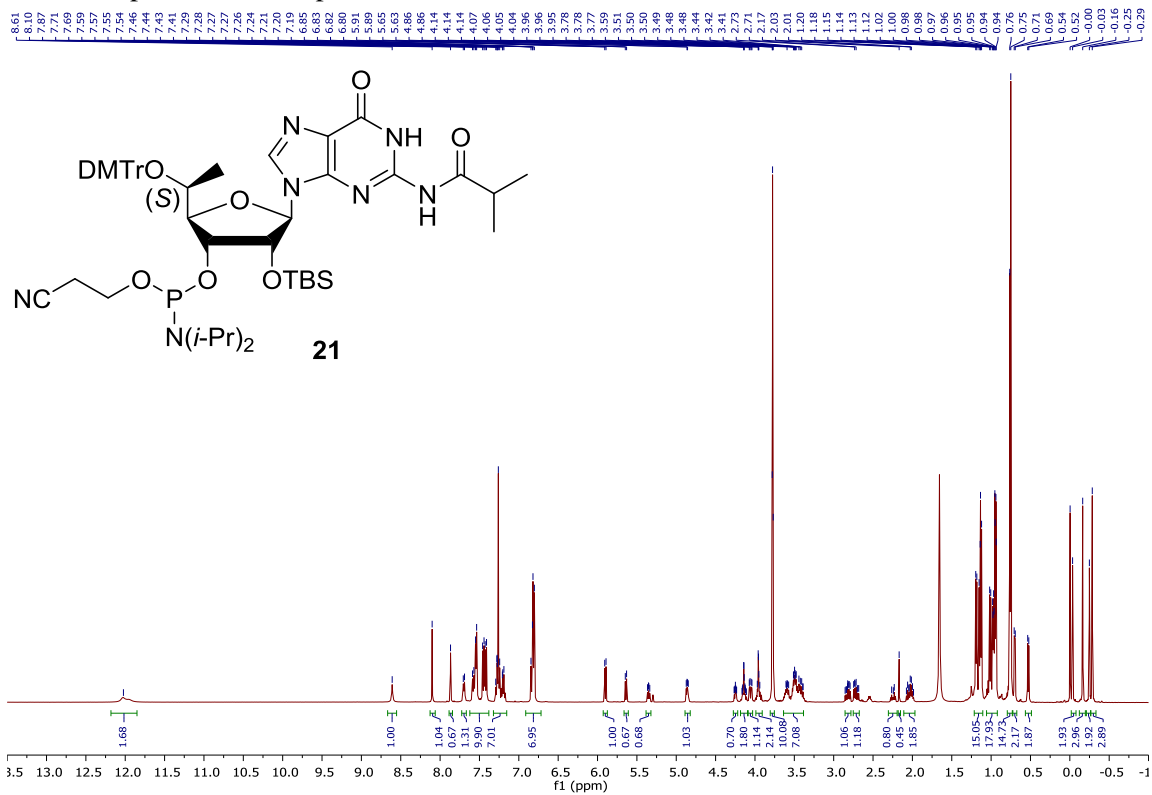

<sup>31</sup>P NMR spectrum of compound 21 in CDCl<sub>3</sub>

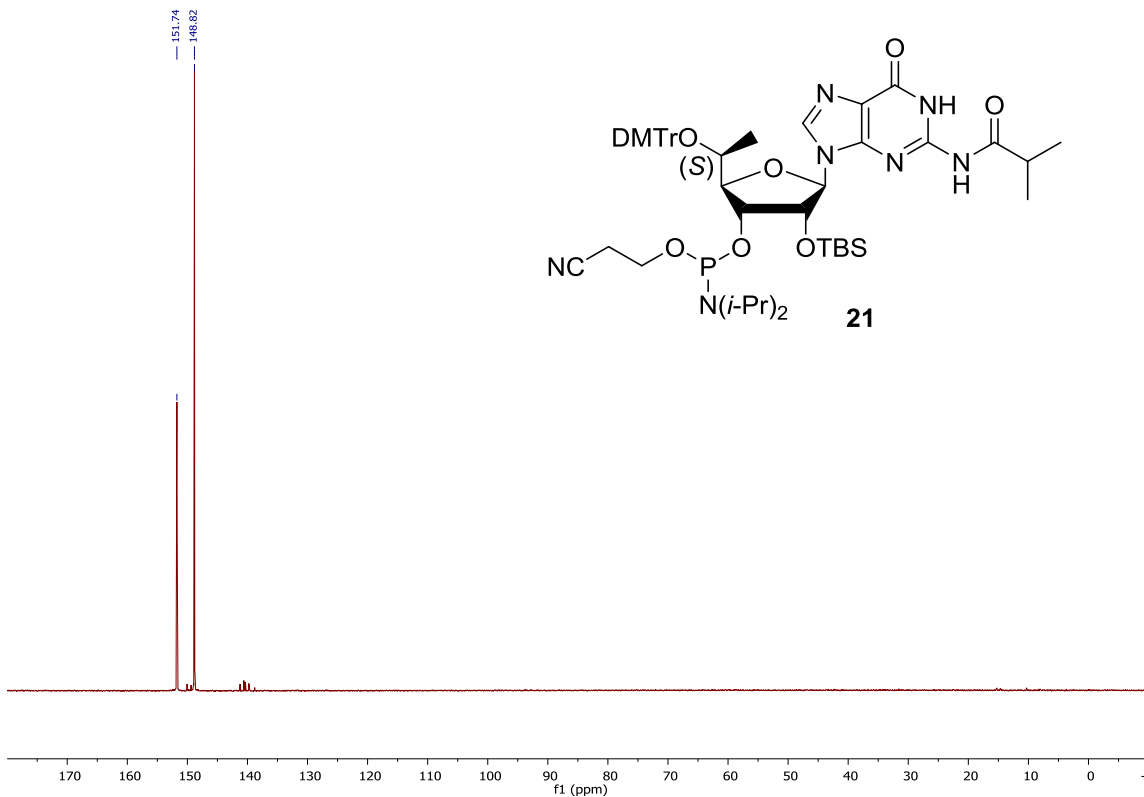

<sup>13</sup>C NMR spectrum of compound 21 in CDCl<sub>3</sub>

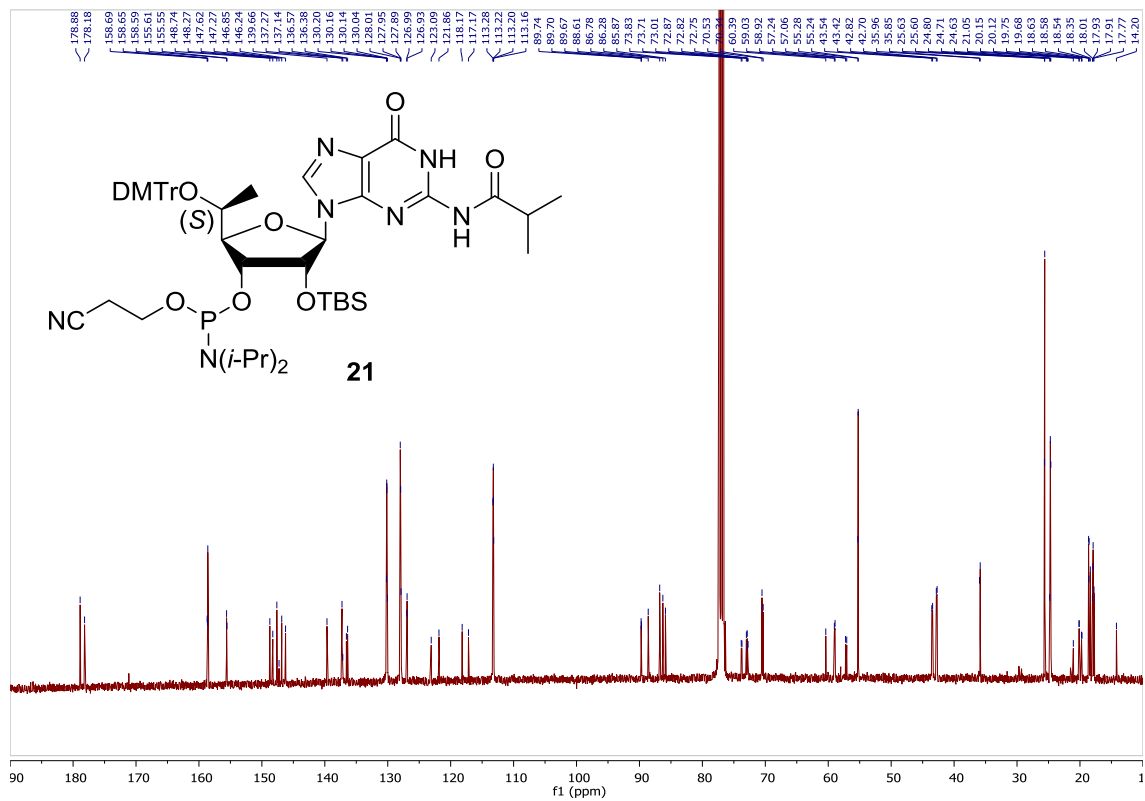

<sup>1</sup>H NMR spectrum of compound 23 in DMSO-d<sub>6</sub>

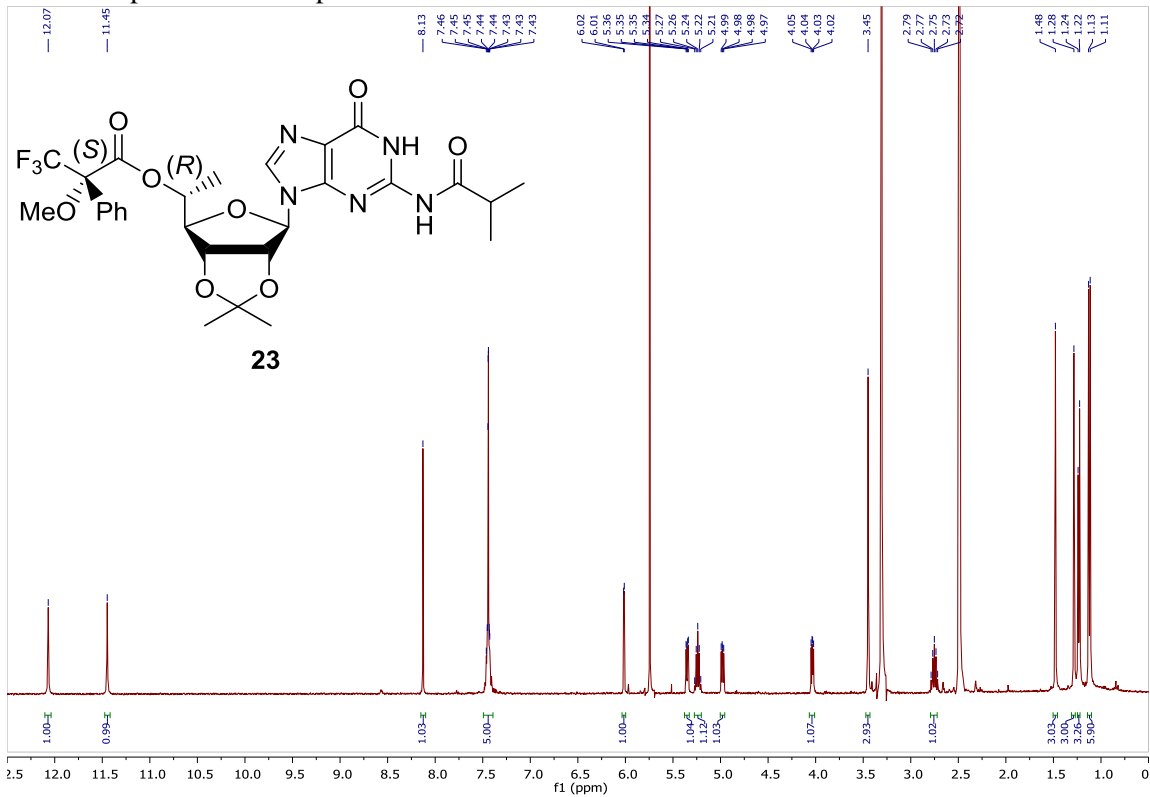

<sup>1</sup>H NMR spectrum of compound 24 in DMSO-d<sub>6</sub>

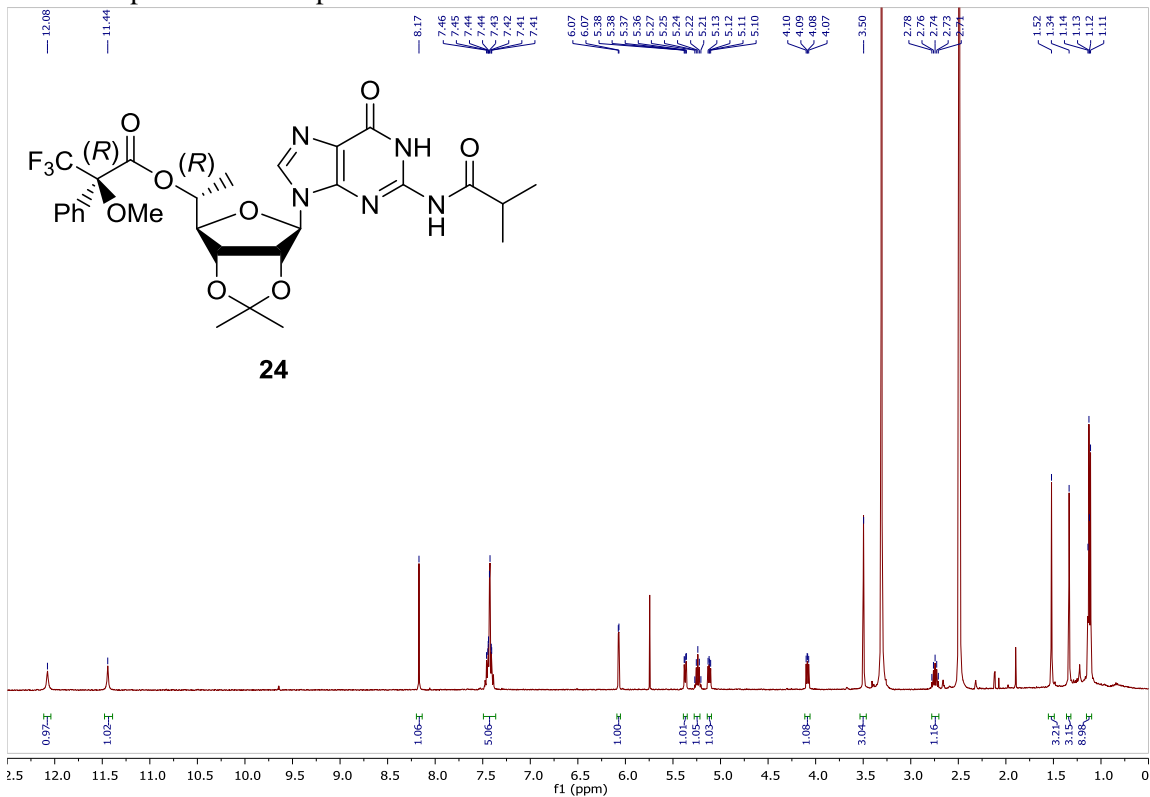

<sup>1</sup>H NMR spectrum of compound 25 in DMSO-d<sub>6</sub>

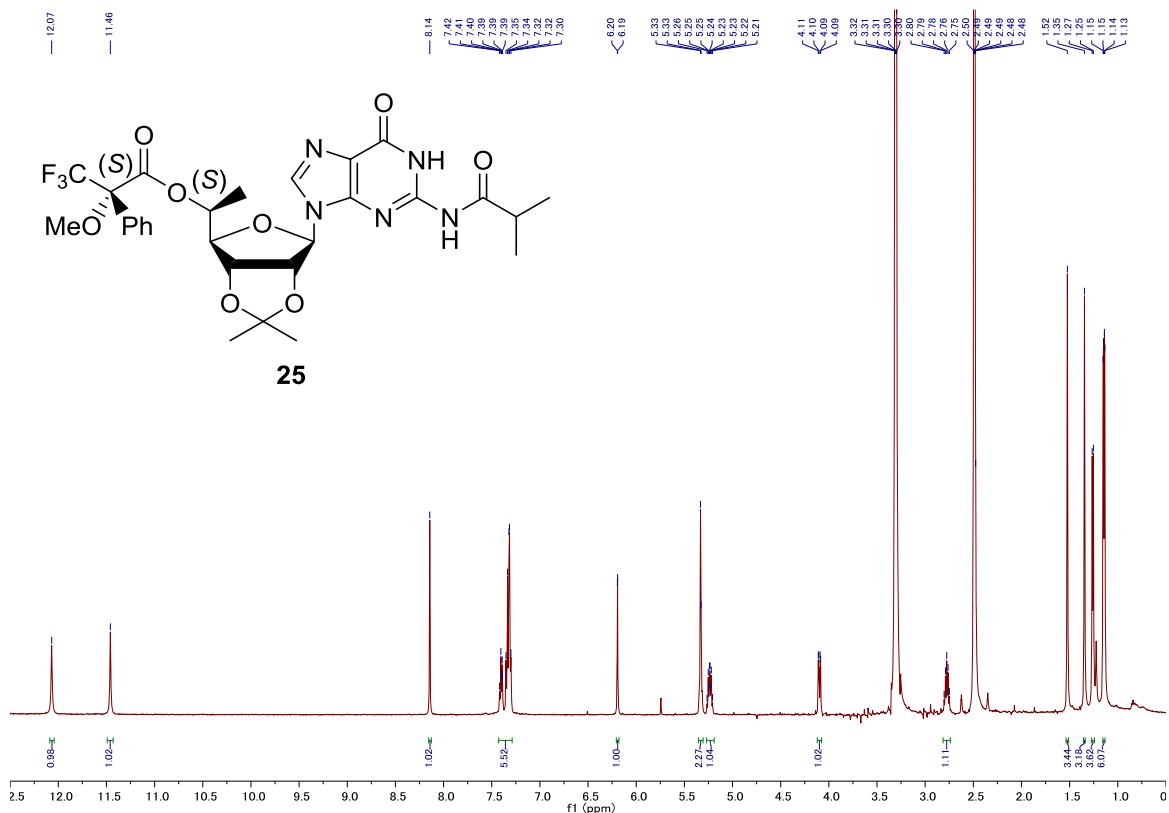

<sup>1</sup>H NMR spectrum of compound 26 in DMSO-d<sub>6</sub>

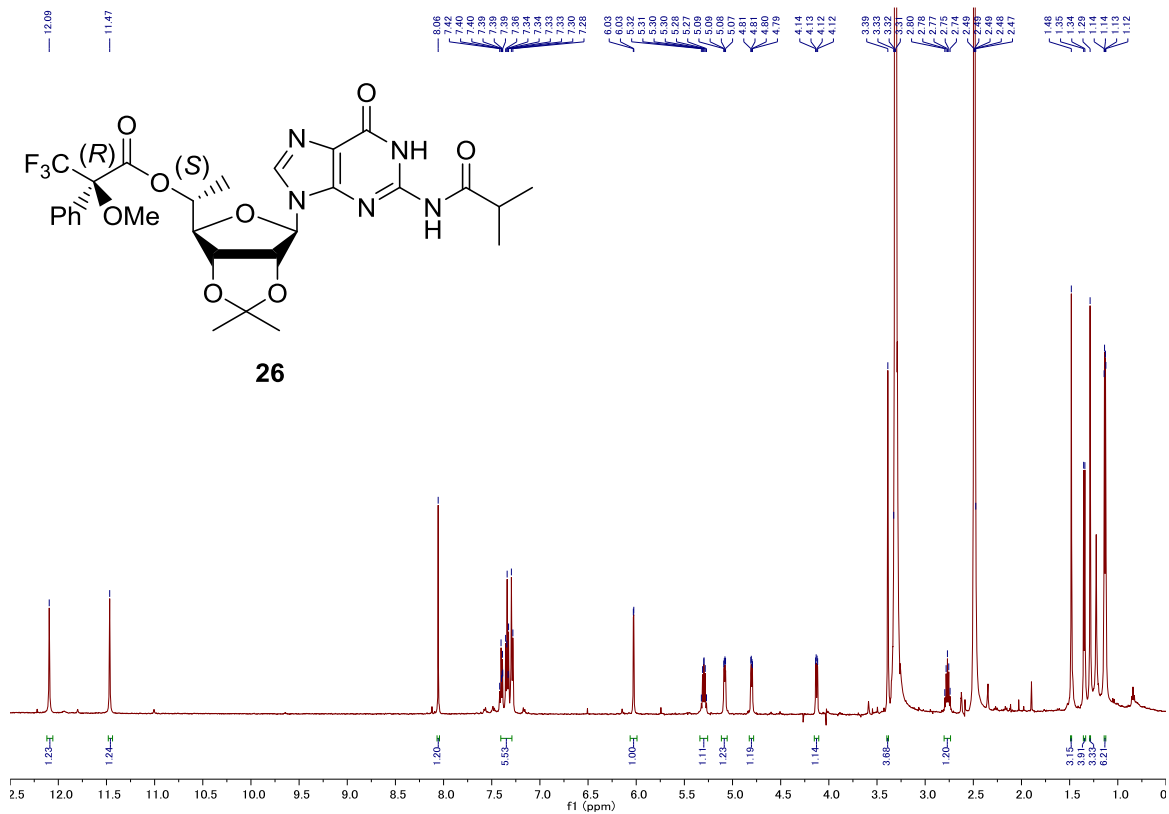

$^1\text{H}$  NMR spectrum of compound 30 in  $\text{D}_2\text{O}$

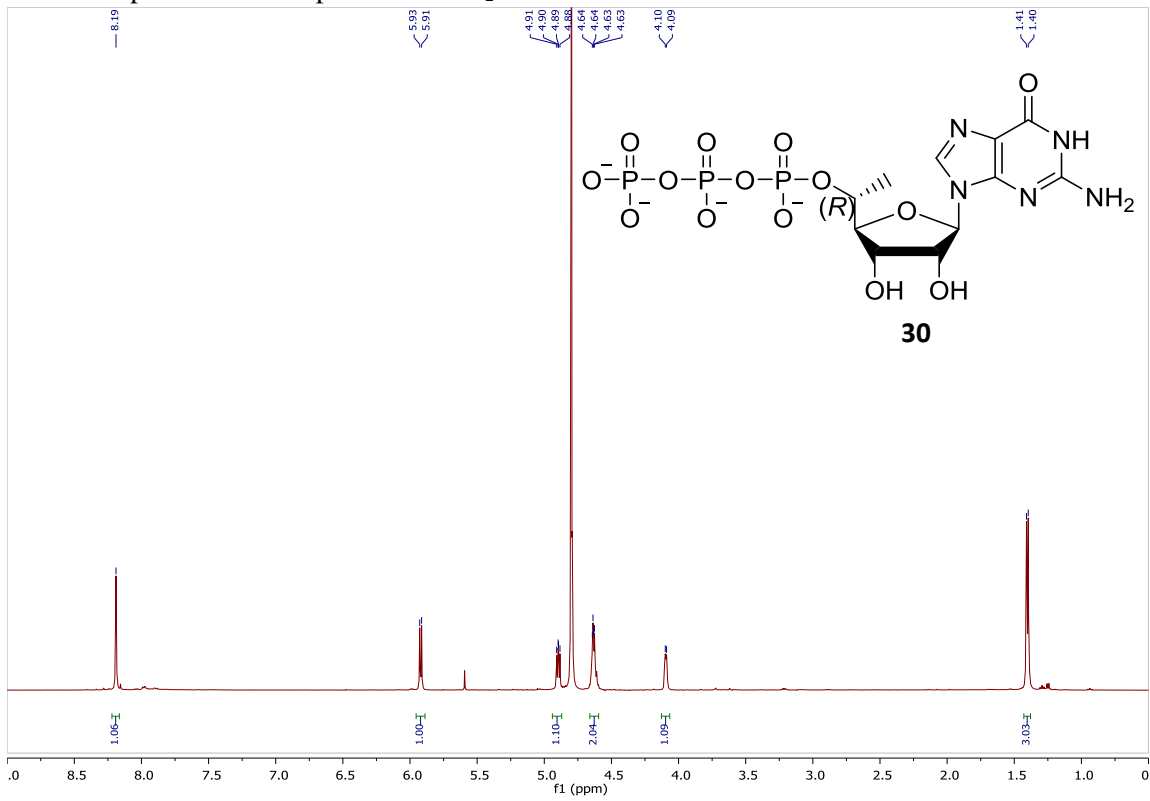

$^{31}\text{P}$  NMR spectrum of compound 30 in  $\text{D}_2\text{O}$

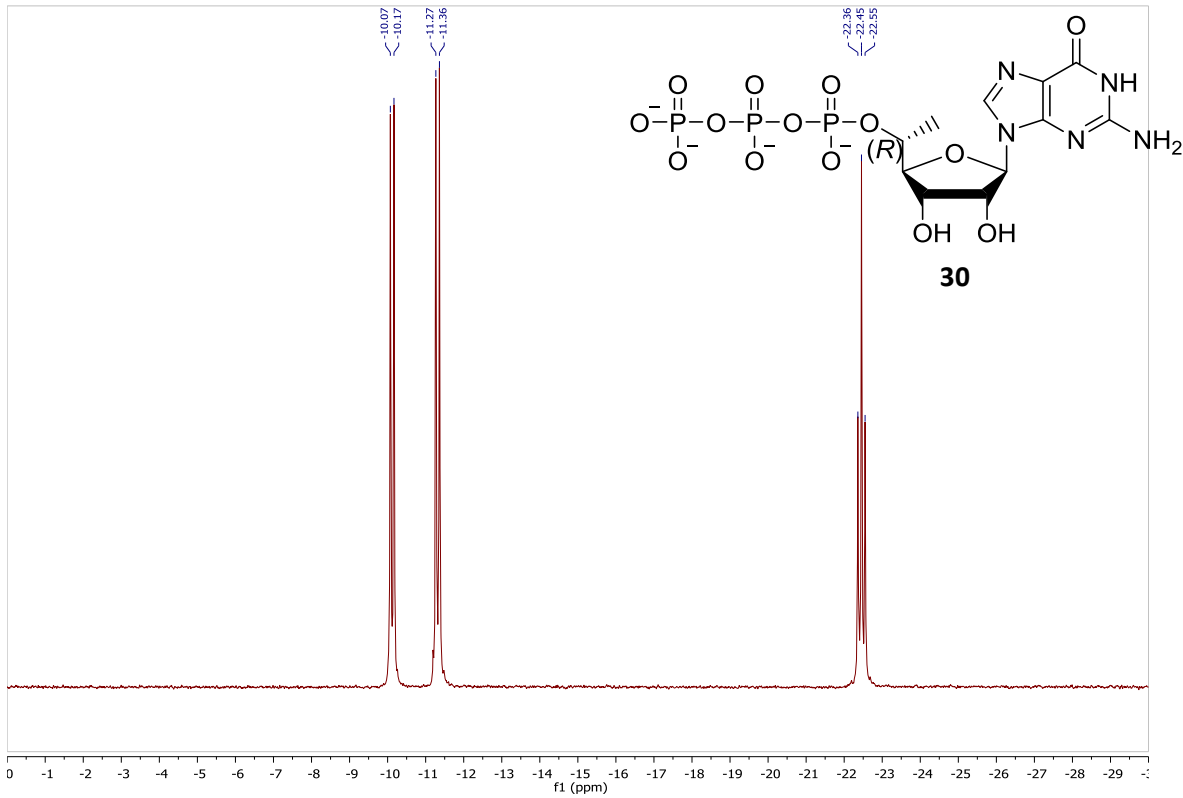

$^1\text{H}$  NMR spectrum of compound 34 in  $\text{D}_2\text{O}$

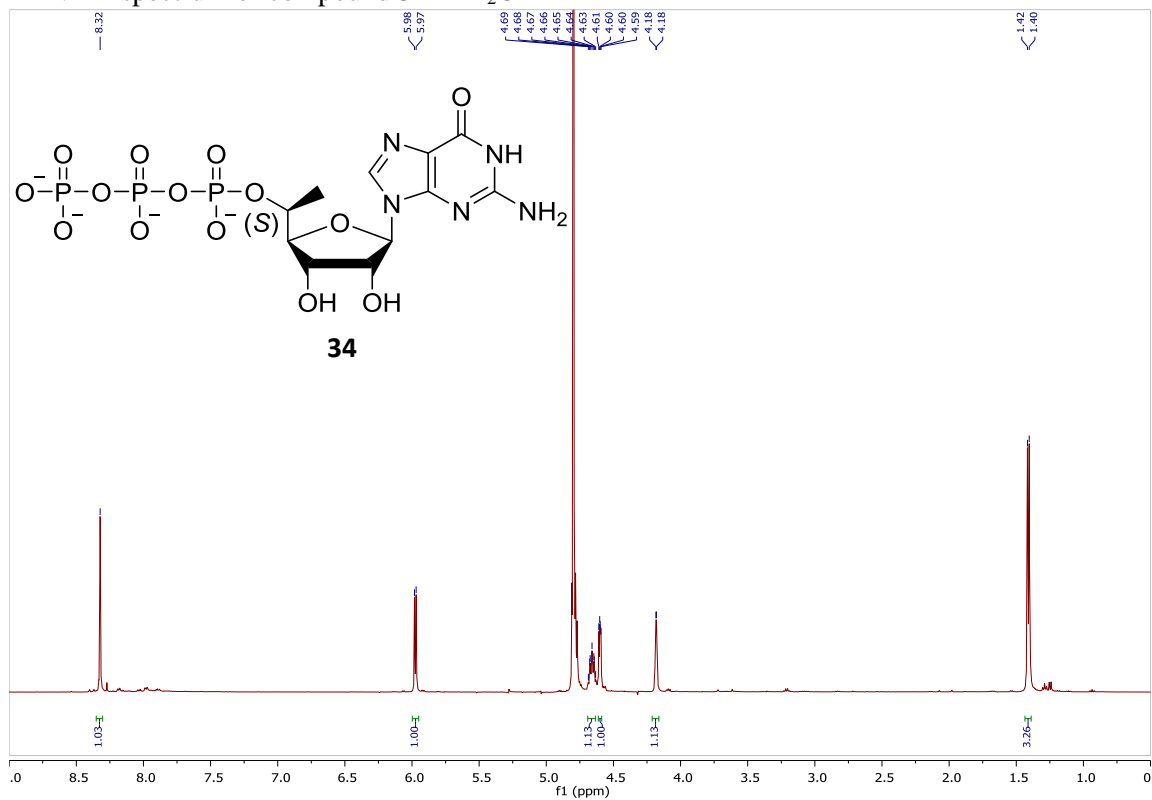

$^{31}\text{P}$  NMR spectrum of compound 34 in  $\text{D}_2\text{O}$

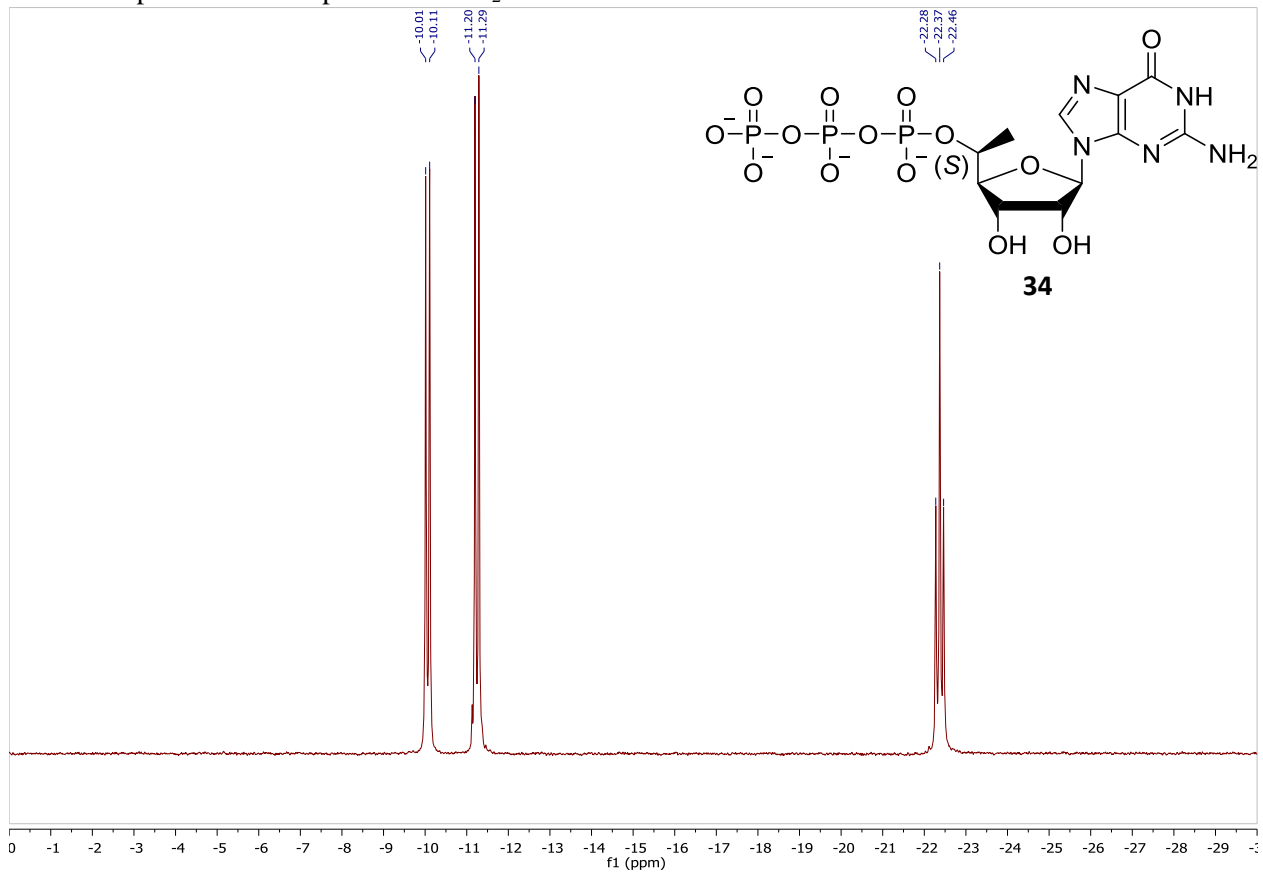

Supplement: gkaa750_supplemental_file.pdf [file gkaa750_supplemental_file.pdf]
